1 A frontosensory circuit for visual context processing is synchronous in the theta/alpha band

2

3 Georgia Bastos<sup>1,2</sup>, Jacob T. Holmes<sup>1</sup>, Jordan M. Ross<sup>1,3</sup>, Anna M. Rader<sup>1,2</sup>, Connor G. Gallimore<sup>1</sup>,

4 Darcy S. Peterka<sup>4</sup>, Jordan P. Hamm<sup>1,2,3</sup>

5

6 Affiliations:

7 1. Neuroscience Institute, Georgia State University, Petit Science Center, 100 Piedmont Ave,

8 Atlanta, GA 30303

9 2. Center for Neuroinflammation and Cardiometabolic Diseases, Georgia State University,

10 Petit Science Center, 100 Piedmont Ave, Atlanta, GA 30303

11 3. Center for Behavioral Neuroscience, Georgia State University, Petit Science Center, 100

12 Piedmont Ave, Atlanta, GA 30303

13 4. Mortimer B. Zuckerman Mind Brain Behavior Institute, Columbia University, New York,

14 NY 10027, USA

15

16

17 \*Corresponding author: Jordan Hamm, 813 Petit Science Center, 100 Piedmont Ave, Atlanta, GA

18 30303; 404-413-5398

19

20

21

22

23

24  
25  
26  
27  
28  
29  
30  
31  
32  
33  
34  
35  
36  
37  
38  
39  
40  
41  
42  
43  
44

## Abstract

Visual processing is strongly influenced by context. Stimuli that deviate from contextual regularities elicit augmented responses in primary visual cortex (V1). These heightened responses, known as “deviance detection,” require both inhibition local to V1 and top-down modulation from higher areas of cortex. Here we investigated the spatiotemporal mechanisms by which these circuit elements interact to support deviance detection. Local field potential recordings in mice in anterior cingulate area (ACa) and V1 during a visual oddball paradigm showed that interregional synchrony peaks in the theta/alpha band (6-12 Hz). Two-photon imaging in V1 revealed that mainly pyramidal neurons exhibited deviance detection, while vasointestinal peptide-positive interneurons (VIPs) increased activity and somatostatin-positive interneurons (SSTs) decreased activity (adapted) to redundant stimuli (prior to deviants). Optogenetic drive of ACa-V1 inputs at 6-12 Hz activated V1-VIPs but inhibited V1-SSTs, mirroring the dynamics present during the oddball paradigm. Chemogenetic inhibition of VIP interneurons disrupted ACa-V1 synchrony and deviance detection responses in V1. These results outline spatiotemporal and interneuron-specific mechanisms of top-down modulation that support visual context processing.

45

## Introduction

46           The brain uses context when processing sensory information to support perception and  
47 guide behavior. Context can include perceived patterns about the environment – both spatial and  
48 temporal information – along with any assumed regularities about which stimuli may be  
49 predictable versus unexpected. In early cortical regions, contextual modulation of sensory evoked  
50 responses serves to sharpen perception and streamlines information processing to guide learning  
51 and behavior. Understanding how these neuronal circuits incorporate and process contextual  
52 information is therefore paramount.

53           One popular generalized framework for understanding and studying context processing in  
54 mammalian neocortex is “predictive processing”<sup>1–3</sup>. Herein, the inferred causes of sensory inputs  
55 – or predictive models of the environment – are encoded in cortical areas hierarchically upstream  
56 from primary sensory cortices, such as secondary/tertiary visual, parietal, or pre-frontal cortices<sup>2,4</sup>.  
57 Such higher areas of cortex send inputs to lower areas representing that include “predictions” about  
58 future sensory input. These inputs can effectively modulate sensory processing, suppressing  
59 cortical responses to stimuli which are expected by the predictive model encoded in the higher  
60 brain area. Stimuli which deviate from this model elicit “prediction errors” in sensory cortex –  
61 typically large neuronal responses to the stimuli in a subset of neurons – which then propagate to  
62 higher areas to update the predictive model of the environment (and beliefs about the underlying  
63 causes of sensory input)<sup>5–7</sup>.

64           Evidence in support of this predictive coding model of sensory processing in the cortex  
65 spans various sensory modalities in multiple mammalian species, from humans to non-human  
66 primates<sup>8,9</sup>, cats, and rodents<sup>10</sup>. Furthermore, recent studies have employed mice to study the cell  
67 and circuit mechanisms of predictive processing<sup>8,11–14</sup>, often using primary visual cortex (V1)

68 during a visual “oddball” paradigm as a model<sup>11,14</sup>. Oddball paradigms are simple and widely used  
69 sensory stimulation paradigms for studying basic predictive processing. An oddball sequence  
70 involves a repeated stimulus (the “redundant”) presented rapidly ( $\approx 1.1$  Hz) and interspersed by a  
71 rare “deviant” stimulus (the “oddball”). In V1, evoked neuronal responses to the redundant  
72 stimulus are attenuated, while responses to the deviant stimuli are augmented<sup>11,14,15</sup>. This  
73 augmented activity, termed “deviance detection (DD)”, may represent a basic form of cortical  
74 “prediction error,” indexing a deviation of current sensory data from the expected input. Our recent  
75 study showed that only a subset of pyramidal neurons (PYRs) in V1 exhibit DD and that these  
76 neurons are enriched in layer 2/3 of cortex<sup>14</sup> (L2/3), consistent with theoretical models of  
77 “prediction error” signal generation in cortical microcircuits<sup>7</sup> and empirical reports of visuomotor  
78 prediction errors<sup>12</sup>.

79 Additionally, this work showed that top-down input to V1 from a prefrontal region, the  
80 anterior cingulate area (ACa), is necessary for the production of DD responses (i.e., prediction  
81 errors) during the oddball paradigm<sup>14</sup>. Interestingly, the axon terminals of ACa neurons projecting  
82 to V1 did not themselves exhibit DD responses, but rather were active during all phases of the  
83 oddball paradigm. This suggests that DD responses present in V1 are not simply inherited from  
84 top-down ACa drive but, rather, that they arise indirectly from ACa modulation of V1. This  
85 modulation could comprise part of the neural basis of the steady “prediction” sent from higher to  
86 lower areas in the predictive coding framework (i.e., rather than the prediction error, which, in  
87 theory, is sent in a bottom-up fashion).

88 The current study sought to both replicate and extend this finding to further describe the  
89 circuit mechanisms which integrate this top-down modulation and give rise to DD responses, the  
90 putative prediction error signals in the oddball paradigm. It is well known that heterogeneous



91 classes of cortical inhibitory interneurons play a crucial role in cortical circuit dynamics<sup>13,16</sup>.  
92 Inhibitory interneurons dictate the gain of PYRs, modulating feature selectivity and precision in  
93 neuronal computations<sup>17-22</sup>. Although it has not been verified, distinct interneurons could interact  
94 to modulate V1 processing to support predictive processing, regulating local gain in accord with  
95 past and present contextual regularities<sup>23</sup> – decreasing excitability among ensembles coding for  
96 predictable stimuli and indirectly increasing excitability among ensembles coding for non-  
97 predicted stimuli (i.e., deviants). Our recent study showed that local somatostatin-positive  
98 interneurons (SSTs) in V1 of mice are necessary for the generation of prediction error responses  
99 to deviant stimuli (DD) in sensory oddball paradigms<sup>11</sup>. Exactly how SSTs enabled DD is  
100 unknown, and it is particularly unclear given that they heavily inhibit L2/3 PYRs in V1, where DD  
101 is enriched. Another class of interneurons, the vasoactive intestinal peptide-expressing  
102 interneurons (VIPs) in V1 could also be critical for the generation of prediction errors considering  
103 their well-established mediation of top-down inputs from Aca<sup>24,25</sup> and their mutually inhibitory  
104 interactions with local SSTs<sup>26,27</sup>. As mentioned above, both Aca inputs to V1 and local V1 SSTs  
105 were deemed necessary for DD in PYRs. In this paper, we sought to elucidate how VIP activity  
106 relates to Aca inputs and V1 SSTs during the oddball paradigm and, further, to test whether VIPs  
107 are also critical for DD in V1. We hypothesized that VIPs could serve as a mediator in top-down  
108 modulation of V1 during the oddball paradigm, and that this could serve to disinhibit subsets of  
109 PYRs by inhibition of SSTs, enabling DD via an Aca to VIP to SST to PYR disinhibitory circuit.

110 Interneurons, besides serving to spatially modulate the gain of PYRs, can also enhance the  
111 generation and maintenance of cortical oscillations<sup>28</sup>. The study of these oscillatory rhythms, either  
112 in intracranial local field potential (LFP) or scalp EEG recordings, affords a distinct window into  
113 the circuit dynamics that affect perception, underlie cognition, and are altered in disease<sup>29-36</sup>.

114 Through the emergence of rhythmic synchronized activity in distinct bandwidths (e.g. theta, alpha,  
115 beta, gamma), neuronal networks optimize information processing and, importantly, provide  
116 temporal windows that gate or route long-range inputs, structuring their influence on ongoing local  
117 processing<sup>37</sup>. For example, during active attentional tasks in non-human primates, top-down or  
118 feed-back connections in the visual system exhibit activity in the high alpha or beta domain (9-  
119 25Hz), while feed forward and local connections exhibit oscillatory signatures in the delta/theta  
120 (3-8Hz) and gamma bands (25-10 Hz)<sup>10,38</sup>. In primary sensory regions, DD signals appear to  
121 occupy mainly delta/theta frequencies (3-8 Hz) in both visual<sup>11</sup> and auditory oddball paradigms<sup>39</sup>,  
122 supporting the notion that DD signals are prediction errors that are “fed-forward” in cortical  
123 networks. However, the frequency band that the top-down modulatory circuit from ACa to V1  
124 occupies in the oddball paradigm has not been established. Guided by recent work on inter-cortical  
125 interactions in top-down and bottom-up directions in primates<sup>40</sup>, we hypothesized that this  
126 connection would be expected to show maximal synchrony in the alpha-beta bands.

127 Here we tested these frequency and cell-type specific hypotheses of predictive processing  
128 in V1 during the oddball paradigm. We first replicated the finding that V1 exhibits bona-fide DD-  
129 like responses in the LFP, which are most prominent in the lower theta-band (3-8 Hz). We then go  
130 on to show that interregional synchrony between ACa and V1 is strongest in the higher-  
131 theta/alpha-band, peaking around 10 Hz. This interaction was directional during redundant  
132 (predictable) stimuli, with larger granger causality flowing from ACa to V1 than V1 to ACa (i.e.,  
133 top-down). Further, with two-photon imaging during the oddball paradigm, we show that L2/3  
134 PYRs exhibit deviance detection in V1 (replicating past work), but VIPs, SSTs, and ACa-inputs  
135 do not, showing similar response magnitudes to both the deviant and context-neutral stimuli. On  
136 the other hand, with redundant stimuli (i.e., prior to the deviant stimulus) theVIP and SST activity

137 patterns diverged: VIPs show sensitization (increased responses) to redundant stimuli, while SSTs  
138 show enhanced adaptation (decreased responses). Also, artificial excitation of the ACa inputs to  
139 V1 with optogenetic activation at 6 or 10-Hz (the peak synchrony during this paradigm) drove  
140 these interneuron populations differentially, with VIPs excited and SSTs inhibited, suggesting that  
141 the ACa to V1 directional synchrony we observed in the LFP experiments served to selectively  
142 modulate VIPs and SST responses to redundant stimuli. Finally, we demonstrate that  
143 chemicogenetic suppression of VIPs eliminates this ACA-V1 synchrony as well as DD. Thus, our  
144 results suggest that top-down modulation of V1 during predictive processing is frequency specific  
145 and indirectly enables prediction-error-like responses (DD) in PYRs via a VIP-to-SST  
146 disinhibitory circuit.

## 147 **Results**

### 148 **Deviance detection in visual cortex occurs in low theta-band power and phase locking.**

149 We recorded local field potentials (LFP) simultaneously from frontal and visual cortices of  
150 mice while the animal observed a classic visual oddball paradigm. Two bipolar electrodes  
151 (contacts separated by  $<400\ \mu\text{m}$ ) were implanted in the anterior cingulate cortex (ACa) and in the  
152 primary visual cortex (V1). ACa was chosen because i) it is higher in the cortical hierarchy than  
153 V1, ii) it is known to send dense top-down projections to V1<sup>41</sup>, and ii) our past work has shown  
154 that suppressing these projections eliminates deviance detection in V1 during a visual oddball  
155 paradigm<sup>42</sup>. Electrode locations were confirmed postmortem as previously described<sup>11,42</sup> (Fig S1  
156 A,B). Visual stimuli consisted of black and white, full-field square-wave gratings at approximately  
157 0.8 cycles per degree, drifting at 2 cycles per second, each presented for 500 ms and separated  
158 from one another by 500-600 ms of medium luminance gray screen. As previously described, we  
159 presented identical stimuli in three different contexts: when the stimulus was equiprobable

160 (p=.125), redundant (p=.875), or deviant (p=.125; Fig 1C). During recordings, the animals were  
161 awake and responsive, head-fixed on a small treadmill so that they were walk in place (Fig 1 A-  
162 C). While locomotion is known to impact V1 activity<sup>43</sup>, mice did not show differences in  
163 locomotion across the trial types (deviant, redundant, control), suggesting that locomotion could  
164 not likely explain differences in stimulus processing across contexts in the oddball paradigm (Fig  
165 S1 C,D), in line with past work<sup>11,42</sup>.

166 Although many studies include an active behavioral task during sensory processing  
167 paradigms as a strategy for ensuring attention to the stimuli and engaging prefrontal regions, we  
168 specifically excluded it and overt behavior, instead employing passive paradigms, for multiple  
169 reasons. First, animals should, in theory, be able to detect unexpected stimuli even in the absence  
170 of reward anticipation or an explicit goal. Studying this function was an aim of our work. Second,  
171 recent work has shown that processing rewards or punishments activates VIP activity cortex  
172 wide<sup>44</sup>. This could confound our results, as we aim to study the role of VIPs in modulating sensory  
173 processing *purely with respect to sensory expectation*, which requires that any explicit rewards or  
174 punishments *not* be a part of the paradigm.

175 The trial averaged evoked LFP responses for a given stimulus during the control, redundant  
176 and deviant trials were generated for each mouse and averaged over mice (Fig 1D). Individual trial  
177 activity (top) and trial-averaged activity (bottom) shows that ACa does not elicit a strong visually-  
178 evoked response, while V1 does, as expected. V1 exhibited deviance detection (DD; increased  
179 activity to deviant stimulus) specifically in the lower theta band (3-8 Hz) during the oddball  
180 paradigm (Fig 1E). Stimulus-induced theta power in V1 was higher during the deviant and  
181 decreased during the redundant stimuli (Fig 1, F, main effect of STIMTYPE, control vs deviant;  
182  $F(1,6)=8.66, p<.05$ ). In addition, intertrial phase-locking in the low theta band in V1 was also

183 higher for deviant trials (Fig 1, G-H, main effect of STIMTYPE, control vs deviant;  $F(1,6)=10.65$ ,  
184  $p<.005$ ). These results are in accord with previous findings on V1 activity during context  
185 processing<sup>11,45</sup>, and demonstrates that sensory processing, even in canonically “early” areas like  
186 V1, depends on context of the stimuli.

187 **Long-range synchrony in the theta/alpha band during the oddball paradigm suggests top-**  
188 **down modulation of V1.**

189 We analyzed the relationship between activity in V1 and ACa during the oddball paradigm.  
190 We probed the phase-coherence between these regions as a marker of their communication  
191 throughout the task (Fig 2A). Interregional synchrony was quantified as 1-circ variance (R-  
192 statistic) between ACa and V1 from 100 ms pre-stimulus onset to 100 ms post-stimulus offset.  
193 ACa-V1 phase-locking was statistically significant ( $p<.05$ ) for frequencies between 1-22 Hz and  
194 peaked at 10 Hz (Fig 2B). Interregional phase coherence was strong and ongoing throughout the  
195 paradigm and significant even after subtracting the rest period synchrony (Fig 2B -inset). Further,  
196 this ACa-V1 coherence was strongest in layer 1 in visual cortex, consistent with this reflecting  
197 top-down inputs from ACa to V1 (Fig 2C). Further, this layer distribution is evidence against the  
198 notion that this ACa-V1 synchrony reflects simple volume conduction of hippocampal theta.

199 Interestingly, the magnitude of this coherence did not differ as a function of stimulus  
200 context (Fig 2D), bringing into question how this apparent synchrony relates to predictive  
201 processing during the oddball paradigm. One possibility is that this interregional coherence  
202 reflects a bidirectional modulation, with top-down inputs conveying “predictions” and bottom-up  
203 outputs conveying “prediction errors”, and the relative strength or influence varying from bottom-  
204 up to top-down depending on how the current stimulus fits with the internal model of the  
205 environment (i.e. which stimuli are and are not likely). To test this, we carried out granger

206 causality analysis to determine how theta-phase in one region predicted the gamma power in the  
207 other at  $1/8^{\text{th}}$  of a theta cycle in the future (similar to other work in cortico-cortical circuits<sup>38</sup>).  
208 Previous research has demonstrated that high-gamma power in neocortex reflects synchronous  
209 local neuronal activity<sup>46</sup> (and also correlates strongly and directly with the fMRI BOLD  
210 signal<sup>28,47</sup>). Granger coefficients were quantified bidirectionally (ACa to V1 [“top-down”] and V1  
211 to ACa [“bottom-up”]) and scaled as percentage of top-down minus bottom up divided by average  
212 of both, from 100ms pre to 100ms post-stimulus. In general, ACa theta granger-caused V1 gamma  
213 power at much higher levels than the reverse direction, and the strongest ACa to V1 causation for  
214 each recording’s “peak” theta (ranging from 4 to 12 Hz) was in the high gamma-power (80-120  
215 Hz; Fig 2E). Bar plots and individual mouse (points) data from the peak region in Fig 2E quantified  
216 for control, redundant, and deviant stimulus conditions, show a stimulus-type by direction  
217 interaction ( $F(3, 24)=10.0$ ,  $p<.01$ ). The phase of PFC-theta significantly Granger caused V1-  
218 gamma during redundant trials (Fig 2F,  $t(6)=2.57$ ,  $p<.05$ ), and this effect is enhanced for later  
219 redundants in the sequence (Fig 2G,  $t(6)=3.30$ ,  $p<.05$  vs  $t(6)=0.97$ ,  $p=.36$ ), suggesting that it scales  
220 with how well the current stimulus matches predictions (which are presumably built on  
221 accumulated evidence from preceding trials<sup>2</sup>).

222 To summarize, ACa and V1 synchronize in the theta/alpha band. During the most  
223 predictable stimuli, the direction of theta/alpha modulation is strongest from ACa to V1 (rather  
224 than V1 to ACa). That is, when the bottom-up information about the visual stimulus, in V1 is most  
225 consistent with the contextual regularities (i.e. redundant), the ACa-to-V1 influence is maximal.  
226 This suggests that ACa inputs convey predictive information about current stimuli to V1,  
227 consistent with past theories.

228 **Heterogenous cell-type and top-down dynamics in ACa-V1 circuits during the oddball**  
229 **paradigm.**

230 We next investigated how ACa projections to V1, as well as how specific layer 2/3 V1  
231 neurons (VIPs, SSTs, and PYRs), are active during the oddball paradigm to further test this model  
232 of top-down predictive processing from ACa to V1. Our past work showed that while layer 2/3  
233 PYRs in V1 show deviance detection (DD; i.e. increased responses to deviant stimuli relative to  
234 controls) and stimulus specific adaption (SSA; i.e. reduced responses to redundant stimuli relative  
235 to controls), the ACa terminals in layer 1 (L1) of V1 show *neither* DD nor SSA<sup>42</sup>. In line with our  
236 LFP results (Fig 1D, 2F), this suggests that these top-down inputs are not responding to the current  
237 stimulus, but, perhaps instead, could be sending information about the currently “predicted”  
238 stimulus.

239 Our past work shows that SSTs are necessary for V1 DD<sup>11</sup>, but it remains unclear exactly  
240 what role SSTs play during the oddball paradigm. In theory, SSTs could i) passively mediate a  
241 tonic disinhibition (of L2/3 PYRs which exhibit DD) during the highly predictable stimulus train  
242 (and thus immediately prior to the deviant stimulus) or ii) carry out a more “active” disinhibition,  
243 selectively releasing DD-exhibiting PYRs from inhibition from other interneurons by directly  
244 inhibiting other interneurons the presentation of a deviant stimulus. Recording SSTs during the  
245 oddball paradigm would help clarify their role. If the mechanism is passive (i), they should show  
246 increased adaptation during redundant phase, indirectly disinhibiting the PYRs they target. If their  
247 role is active (ii), they should show increased activity during the deviant stimulus (i.e., they should  
248 show a form of DD as well), temporally prior or concurrent with PYRs exhibiting DD to the  
249 deviant stimulus.

250 Fast two-photon microscopy (28 Hz resonant scanning) was employed to record neuronal  
251 activity from cortical layers 1-2/3 in V1 (50-300  $\mu\text{m}$  below the brain surface) as awake, head-fixed  
252 mice viewed the oddball and many-standards control sequences (described above). We imaged the  
253 activity of layer 2/3 PYRs (n=4 mice, 323 neurons), SSTs (n=8 mice, 328 neurons), VIPs (n=9  
254 mice, 284 neurons) ,and ACa axons in V1 (n=4 mice, 100 synaptic boutons and axonal segments  
255 which were deemed functionally uncorrelated [see methods]). Transgenic mice expressing cre-  
256 dependent GCaMP6s crossed with tm1.1-VGluT-, SST- and VIP-cre- lines were used (Fig 3A-C)  
257 except in experiments recording ACa axons in V1, where AAV1-Syn/Cag-GCaMP6s was virally  
258 expressed in ACa (Fig 3D) and imaged in L1 of V1 as previously described<sup>42</sup>. Visual stimulation  
259 was the same as reported in Fig 1 and 2. For analysis, only “visually responsive” neurons or  
260 boutons/axon-segments (showing >1 standard deviation from average response over baseline to at  
261 least one stimulus [out of 4 orientations: 0, 90, 45, 135 deg] under at least one condition [control,  
262 redundant, deviant]) were considered (89% of neurons recorded for PYRs; 98% for SSTs; 93% for  
263 VIPs; 89% for ACa axons). If a neuron/axonal-segment showed significant activity to more than  
264 one oriented stimulus, we plotted and used only one (the strongest after averaging across contexts)  
265 for statistical tests (Fig 3 A-D)<sup>14</sup>.

266 As previously reported<sup>42</sup>, the PYRs showed DD (responses to deviant vs control: paired  
267  $t(320)=3.17$ ,  $p<.005$ ), and SSA (redundant vs control; paired  $t(320)=-3.5$ , $p<.001$ ) (Fig 3A,E-F).  
268 Interestingly, SSTs did not show DD (paired  $t(326)=0.53$ ,  $p=0.60$ ), but showed strong SSA (Fig  
269 3B,E-F, paired  $t(326)=-6.95$ , $p<.001$ ). VIPs also did not show DD (Fig 3C, deviant vs control:  
270 paired  $t(282)=1.2$ ,  $p=0.233$ ) but, surprisingly, were more during active to redundant stimuli  
271 (redundant vs control; paired  $t(282)=2.82$ , $p<.005$ ), suggesting that VIPs exhibit a form of  
272 repetition sensitization or reverse adaptation. Consistent with our past work<sup>42</sup>, stimulus responsive



273 Aca axons showed neither DD or SSA. That is, Aca axons in V1 showed stimulus induced activity  
274 which did not vary as a function of stimulus-type (Fig 3D-F redundant vs control; paired  $t(87)=-$   
275  $0.17$ ,  $p=.87$ , deviant vs control: paired  $t(87)=-0.56$ ,  $p=0.58$ ). A closer analysis of Aca axon  
276 activity, however, evinced greater variance across the population of inputs during the oddball  
277 paradigm compared to the during the many-standards control (Fig S2H,I; Bartlett's test  
278 statistic<sup>ctrl\_vs\_rdnt</sup>=4.60,  $p<.05$ ; BTS<sup>ctrl\_vs\_dev</sup>=11.6,  $p<.001$ ; BTS<sup>dev\_vs\_rdnt</sup>=1.70,  $p=.20$ ). This  
279 suggests a wider spread of input magnitudes, including more highly active and more silent inputs  
280 during the oddball, when the putative predictive model is simpler (one orientation expected -- i.e.  
281 more precise priors). During the control paradigm, when the putative predictive model is more  
282 general (8 possible orientations), there was a more gaussian spread of Aca-V1 input magnitudes  
283 across the population of axons.

284 Only PYRs showed marked DD. Interestingly though, DD was not present in all PYRs.  
285 We estimated that approximately 11.5% of PYRs showed reliable DD across recordings (by  
286 splitting early and later trials; consistent with our past estimate<sup>42</sup>). This heterogeneity of DD  
287 responses across PYRs was not simply explained by differences in stimulus feature selectivity, as  
288 PYRs selective for any orientation (O.S.I.>0.20) showed deviance detection to both their preferred  
289 orientation and to their non-preferred orientations, and non-selective PYRs also showed DD (Fig  
290 S2A,E). However, the magnitude of the deviant vs control difference, (Fig S2A) and the degree to  
291 which a given PYR showed DD (Fig S2E) was positively related to the cell's orientation  
292 selectivity, suggesting that DD may reflect a non-specific gain modulation in V1.

293 Aca axons, SSTs, and VIPs did not differ in their activations to deviant stimuli (relative to  
294 control; Fig 3F). These cell types did, however, differ in their activations to redundant stimuli  
295 (either in magnitude for VIPs and SSTs, or in their directional synchrony, as for Aca). It is

296 therefore possible that the causal role that SSTs and ACa-inputs play in supporting DD (shown  
297 previously<sup>11,14</sup>) involve activity during the redundant stimulus train, prior to the deviant stimulus.  
298 Specifically, the fact that SSTs in our data do not show strong responses to the deviant stimulus  
299 (i.e., no DD) suggests that SST's role in DD is not one of active disinhibition of PYRs *during* the  
300 deviant stimulus (hypothesis (ii) above), but, rather, by strongly adapting during the redundant  
301 stimulus, one of indirect disinhibition of PYRs in the buildup to the deviant, contextually  
302 unexpected stimulus (hypothesis (i)). Conversely, VIP neurons showed augmented responses to  
303 redundant stimuli (Fig 3E). Given known mutual inhibition between VIPs and SSTs, this  
304 sensitization of VIPs may essentially give rise to the SST inhibition, or vice versa, or both.

305         Interestingly, ACa inputs to V1 did not reduce the overall magnitude of their activity during  
306 the redundant stimuli either (i.e., no SSA), but, instead, exerted a stronger causal influence V1  
307 during redundant stimuli (when predictions match sensory data; Fig 2F,G). Further, ACa inputs  
308 appeared to convey different information to V1 during mostly-predictable vs less-predictable  
309 contexts (i.e. different population variance in oddball vs control runs; Fig S2H,I), but not during  
310 predicted vs unexpected stimuli *per se* (redundants vs deviants), suggesting that ACa inputs to V1  
311 convey *a priori* “predictions” about the current sensory data to V1. It is possible that this top-down  
312 input from ACa is modulatory and serves to amplify VIP neuron responses to predictable stimuli.  
313 This advantage that VIPs could have over SSTs would cause them to “win out” in highly  
314 predictable contexts, effectively disinhibiting subsets of PYRs during the redundant phase of the  
315 paradigm, priming them for DD responses to an unexpected stimulus. On the whole this suggests  
316 the presence of a disynaptic inhibitory circuit of ACa-to-VIPs-to-SSTs explaining the causal role  
317 of ACa and SSTs in V1 DD<sup>42</sup> (Fig S6).

318 **Top-down drive of V1 from ACa in the theta/alpha band activates VIPs and suppresses SSTs.**

319 To further test this putative ACa modulation of VIP-SST circuits, we optogenetically  
320 activated ACa inputs to V1 during rest. We drove these inputs at a range of frequencies informed  
321 by our LFP experiments. Based on our two-photon results (Fig 3), we predicted that that driving  
322 these axons at frequencies relevant to this circuit and paradigm (see Fig 2) – namely theta/alpha  
323 frequencies –should increase activity of V1 VIPs and PYRs while decreasing activity of V1 SSTs.  
324 An AAV transducing an excitatory channelrhodopsin (ChR2) under the CaMKIIa promoter  
325 (AAV9-CaMKIIa-hChR2(H134R)-mCherry) was injected into ACa (Fig S3A,B) of mice  
326 expressing GCaMP6S in PYR, VIP, or SST interneurons. Rhythmic wide-field optogenetic  
327 stimulation was performed through a craniotomy placed at the mouse V1. Activity of PYRs, VIPs,  
328 or SSTs was imaged in V1 while 1 second bursts of 473 nm light illuminated the imaging column  
329 to activate ACa axons at 2-, 6-, 10-, 20-, or 40-Hz (20% duty cycle, squarewave pulses; .5mm  
330 radius; 12 mW per mm<sup>2</sup>), a power-normalized “weak” block stimulation, and a full-power block  
331 stimulation (Fig 4, A-B).

332 The activity of V1 cells during frequency-specific driving of ACa-inputs significantly  
333 differed among VIPs, SSTs, and PYRs (Fig 4C,  $F(10,4035)=9.60$ ,  $p<.001$ ). Follow-up analyses  
334 showed that during 6 and 10-Hz stimulation, PYR and VIP responses differed from SST  
335 interneurons, with VIPs and PYRs increasing their activation while SST decreasing below baseline  
336 (all  $p<.001$ ). Consistent with our hypothesis, the cell-specific responses after top-down theta/alpha  
337 activation (6- and 10-Hz) point to a possible VIP to SST to PYR top-down disynaptic disinhibitory  
338 motif that is preferably engaged through ACa-to-V1 modulation during the oddball paradigm. This  
339 motif can be found in other areas of the cortex<sup>18,48</sup>, although some direct activation of PYRs during  
340 our optogenetic stimulation could result from direct synapses of ACa on PYRs<sup>24</sup>.

341           It was also apparent that 40-Hz stimulation strongly activated VIPs. Past work on Aca-V1  
342   circuitry showed that top-down gamma-band drive of Aca projections to V1 promotes post-error  
343   performance during an active visual attention task<sup>25</sup>. As we did not observe strong Aca-V1 gamma  
344   synchrony during our task-free paradigm, it is possible that the theta/alpha recruitment of V1 and  
345   the gamma recruitment of V1 represent separate mechanisms. Indeed, the heterogeneity of VIP  
346   responses to Aca drive supported this interpretation. Examining the responses of individual SSTs,  
347   VIPs, and PYRs to top-down drive, within-group heterogeneity across frequencies is apparent (Fig  
348   S4). To determine whether there were specific ensembles of cells, reaching across cell-classes, that  
349   activate to different types of top-down drive, we carried out a k-means clustering analysis on the  
350   standardized opto-evoked responses, collapsing across VIPs, SSTs, and PYRs (see Methods).  
351   Shuffling procedures and a scree-approach supports the presence of 6 stimulation clusters (Figure  
352   4D). We took the averages centroid locations across these 6 clusters (on the non-standardized, raw  
353   data) and computed their average responses to each Aca-stimulation condition (Figure 4E). This  
354   included a non-stimulated cluster (accounting for approximately half of the V1 cells) and 5  
355   stimulation clusters. Two of these stimulation clusters included <2% of the imaged cells (likely  
356   outliers). The remaining three major stimulation clusters all comprised greater than 12% of imaged  
357   neurons each. We plotted for each cluster the proportion of SSTs, VIPs, and PYRs relative to the  
358   overall proportion of these cells in the overall dataset. This revealed differences in proportion  
359   across SSTs, VIPs, and PYRs (Figure 4E). Clusters 1 and 2, which showed strong responses to  
360   gamma-stimulation and theta/alpha stimulation, respectively, contained very few SSTs. The  
361   former was primarily VIPs, and the latter included both VIPs and PYRs. Both clusters 1 and 2  
362   showed significant responses to 10 Hz stimulation. Cluster 3 was a broad suppression cluster which  
363   included mostly SSTs. Interestingly, this did not show a specific effect at 10 Hz, suggesting that

364 top-down drive inhibits SSTs regardless of frequency, but that it drives VIPs best at 10 Hz or 40  
365 Hz.

### 366 **VIP interneurons mediate ACa modulation of V1 and support deviance detection.**

367 These results suggest that VIPs mediate the ACa to V1 10 Hz modulation (Fig 2) and are  
368 critical for DD in V1<sup>42</sup>. To directly test this mediating role, inhibitory cre-dependent DREADDS  
369 (AAV8-hSyn-DIO-hM4Di) were used to selectively suppress VIPs in V1 during LFP recordings  
370 during the oddball paradigm. Animals were separated in two groups: control group (no  
371 DREADDS, CNO-only) and experimental group (with DREADDS). CNO was administered  
372 intraperitoneally (IP, 5 mg/kg) to both groups after the first set of recordings. Thirty minutes after  
373 CNO administration, activity from ACa and V1 was recorded again from both groups.

374 In the experimental group, but not the CNO-only control, VIP suppression via CNO led to  
375 an increase in baseline power (inter-stimulus intervals) in V1 (Fig 5B, left; CNOxCONDITION  
376 interaction effect  $F(1,11)=5.08$ ,  $p<.05$ ), confirming a basic disinhibition of V1 by removing a  
377 source of inhibition. Consistent with our hypothesis that VIPs mediate the ACa-V1 modulation,  
378 interregional synchrony between ACa and V1 in the 6 to 12 Hz range decreased after VIP-  
379 suppression (Fig 4C, left; CNOxCONDITION interaction effect  $F(1,11)=5.02$ ,  $p<.05$ ). Again, DD  
380 was present in stimulus induced power in V1 in the low theta-band (3-8Hz); following  
381 chemicogenetic VIP suppression, this DD was eliminated (Fig 5 C-F; Fig S5; CNO x CONDITION  
382 x STIMTYPE interaction effect,  $F(1,11)=7.10$ ,  $p<.05$ ). Altogether these results point to VIP as an  
383 important mediator of top-down predictive processing in the visual system.

### 384 **Discussion:**

385 In summary, these results support a top-down circuit for contextual processing in the visual  
386 cortex (Fig S6). During a simple visual oddball paradigm, ACa and V1 are synchronous mainly in  
387 the theta/alpha band, engaging a mutually inhibitory VIP-SST circuit in V1. As both VIPs and  
388 SSTs are known to inhibit PYRs, engaging this circuit may effectively inhibit and disinhibit  
389 subsets of V1 PYRs to modulate responses to predictable stimuli while potentiating responses to  
390 future non-predicted stimuli (e.g., DD in the oddball paradigm). This model is supported by the  
391 facts i) that ACa and V1 synchronized at 10 Hz during the oddball paradigm, ii) that this synchrony  
392 showed a strong ACa to V1 directionality during highly predictable stimuli, iii) that SSTs showed  
393 strong response suppression *both* during redundant stimuli and 10 Hz stimulation of ACa inputs,  
394 while iv) VIPs, in contrast, showed *response facilitation* during redundant stimuli and 10-Hz  
395 stimulation of ACa inputs, and v) that suppressing VIPs disrupted ACa-V1 synchrony and V1  
396 deviance detection. We discuss how these results fit within a predictive processing framework  
397 below.

### 398 **Top-down modulation influences local cell activity through a distinct frequency channel**

399 The predictive coding framework posits a spatially distributed hierarchical network in the  
400 cortex involving feedforward and feedback connections which continuously modulate sensory  
401 processing (in lower areas) and prediction (in higher areas)<sup>2,49</sup>. This requires that information be  
402 integrated within local circuits and across distal regions. While the spatial organization of physical  
403 connections within and between different brain regions certainly play a role, the temporal  
404 dynamics within these connections may serve to further segregate or route interregional signals to  
405 activate or suppress specific ensembles<sup>40,50</sup>.

406 Our results suggest that, during a highly predictable sequence of visual stimuli, this can  
407 occur through ACa and V1 phase-locking in the theta/alpha band. Interestingly, this synchrony

408 may serve to potentiate responses in specific neural populations in V1 to elicit different responses  
409 at the cell-specific level. Our optogenetic driving experiments support this notion, showing that  
410 Aca inputs to V1 driven at 6- or 10 Hz elicit distinct and opposite responses in interneuron  
411 populations (SST and VIPs). This same pattern of increased VIP activity and decreased SST  
412 activity was observed during the redundant phase of the oddball paradigm, when top-down  
413 theta/alpha influence was strongest, suggesting that theta/alpha band is critical for engaging the  
414 VIP-SST mutually antagonistic circuit necessary for visual spatial<sup>13</sup> and temporal (Fig 5, and <sup>11</sup>)  
415 context processing in V1.

416 Past work in this circuit has shown that Aca may naturally send beta-band signals during  
417 a behavioral error<sup>25</sup>, and that Aca-to-V1 projections target multiple interneuron types to mediate  
418 disynaptic inhibition and support visual attention<sup>24</sup>. Our study complements this by identifying a  
419 theta/alpha-band oscillation during non-goal-directed visual processing and its effect on V1  
420 interneuron types. The precise frequency ranges involved in feedback and feedforward signals may  
421 nevertheless differ between specific regions and animal models. As previously mentioned, in  
422 directed attention tasks with non-human primates (NHPs), feedback activity in the visual system  
423 is driven at the alpha/beta bands, while theta and gamma bands are associated with feedforward  
424 signals<sup>40,51</sup>. It is possible, however, that our theta/alpha range (6-12 Hz) could be functionally  
425 similar to this studies alpha/beta range (10-20 Hz). The exact discrepancy could be due to simple  
426 differences in brain size between mice and NHPs, or due to the nature of the task itself (active vs  
427 passive paradigms; as directed tasks involve a larger information load that require multi-region  
428 integration) or due to the exact brain regions chose (as past work shows slightly varying  
429 bandwidths for the “top-down beta” modulation across cortical regions<sup>40,51</sup>). Nevertheless, our  
430 results are consistent with the core idea of frequency channels being a routing mechanism for

431 feedback modulation and feedforward information<sup>40</sup>, with new evidence provided here that these  
432 temporal dynamics serve to engage specific cell populations.

### 433 **VIPs modulate prediction in the absence of active report**

434 We found that VIP interneurons are more active during predictable stimuli, suggesting  
435 response facilitation during the redundant phases of the oddball paradigm. VIPs did not exhibit a  
436 DD response (i.e., they are not differentially more active to a deviant stimulus compared to a  
437 control/neutral stimulus; figure 3). Further, chemogenetic inhibition of VIPs both altered  
438 interregional synchrony between prefrontal and visual cortices and altered context-dependent  
439 modulation of V1 responses to visual stimuli (i.e., DD; figure 5). Thus, we propose that VIP  
440 activity, through top-down modulation, mediates the ability of V1 to generate differential  
441 responses to predictable-vs-unexpected stimuli (i.e., deviance detection), not just by direct  
442 inhibition of PYRs coding for the predictable stimuli, but by an indirect disinhibition of PYRs  
443 selective for stimuli other than the predictable stimulus (Fig S2). In other words, VIPs distribute  
444 the “predictions” of a sensory context through a pattern of inhibition and disinhibition. In figure  
445 S6, we have provided a schematic based on current and past observations (with some testable  
446 assumptions about connectivity) to facilitate future work into deviance detection circuits. Future  
447 work is necessary to more comprehensively test this  $ACa^{long-range-VIP^{V1}}-SST^{V1}-PYR^{V1}$  deviance  
448 detection circuit, including studies which selectively inhibit each element while imaging the other,  
449 during different phases of the paradigm. Results here make significant strides to formulating a  
450 working model of this deviance detection circuit (Fig 6). Further, more work is needed to better  
451 understand the heterogeneity present in adaptation vs facilitation vs deviance detection in VIP,  
452 SST, and PYR populations (Fig 3G,H and Fig S2), as well as the roles of other cell types within  
453 V1, including parvalbumin positive interneurons (PVs) and neurogliform cells in layer 1.



454           These findings and interpretations are largely consistent with past work in VIPs in  
455 neocortex. During locomotion, VIP interneurons are responsible for enhancing responses of weak  
456 sensory signals through the same VIP-SST disinhibitory motif that allows for a subset of cells to  
457 be highly excitable, responding promptly and strongly to stimuli<sup>52</sup>. Importantly, we did not find  
458 that mice showed any differential locomotion to deviant vs control vs redundant stimuli, so the  
459 modulatory role of VIPs in our paradigm cannot be simply explained by this function. In general,  
460 VIP+ interneurons are known to modulate neural activity throughout the cortex across brain-states  
461 and behaviors via a number of circuit motifs<sup>53</sup>. For example, VIPs play a disinhibitory role in  
462 modulating PYR neuron activity by inhibiting other interneuron types, PV and SST neurons<sup>48,54</sup>.  
463 The fact that VIPs are localized in superficial cortical areas, which receive the majority of top-  
464 down inputs from higher regions, suggests that they may mediate a form of disynaptic inhibition  
465 and disynaptic dis-inhibition of multiple cell types<sup>55</sup>. Evidence for such motifs have been found in  
466 multiple regions of the mouse cortex<sup>26,43,48,54-56</sup>, and serve to elicit differential responses in brain  
467 networks depending on the task and context.

468           Much of the past research done on the role of cortical VIPs during visual novelty  
469 processing has involved mice and the presence of a trained behavior output, often conditioned  
470 through reward and punishment, and involving locomotion as a part of the behavior<sup>43,44,52,57</sup>. In  
471 this study, we sought to understand the functional dynamics of VIP interneurons in a passive  
472 oddball paradigm in the absence of an active report and an anticipated reward. Notwithstanding  
473 the fact that passive, untrained, or non-goal driven behavior makes up a large part of any animal's  
474 natural life, the value of a strictly passive oddball paradigm is clear from the clinical  
475 neurophysiology literature. One of the best replicated biomarkers of schizophrenia – the mismatch  
476 negativity (an EEG index of DD) – involves a purely passive sensory sequence (i.e. the oddball

477 sequence)<sup>15,58,59</sup>. Interestingly, our finding that VIPs are more strongly active to predictable – but  
478 not unexpected– stimuli contrasts some findings in which VIPs were shown to have higher  
479 activation to novel images in comparison to familiar ones<sup>57</sup>. A key difference here may be the  
480 nature of the paradigm; Garret et al (2020) used a go/no-go task in which the mice had to report  
481 the changes in their visual perception by licking, and by doing so, receiving a reward. This task  
482 involves both locomotion and reward, and recent work has shown that both modulate cortical  
483 activity. In particular, reward and punishment lead to VIP activation<sup>44,57</sup>. Therefore, it is unclear  
484 whether past findings of VIP activation to novel stimuli are associated with the novel stimulus  
485 itself, or with the reward administration, or both.

486         It is possible that a wide range of VIPs functionality is a testament to its flexible and yet  
487 standard response in brain systems: VIPs are active to enhance the difference between neuronal  
488 populations engaged in processing different inputs, regardless of the main driver of VIP activity.  
489 Distal cortical and subcortical inputs modulate VIP responses to stimuli to create leverage in  
490 stimulus evoked responses that through disinhibition may generate an excitability gradient in local  
491 circuits that allow for different ensembles of cells to have a distinct response given the input. This  
492 is a circuit mechanism that allows for gain modulation in neuronal populations in accord with the  
493 needs of the task at hand (passive exploration or reward seeking).

#### 494 **Top-down modulation is necessary yet not specific to redundant trials**

495         Our past work has shown that top-down inputs from ACa to V1 are necessary for visual  
496 DD<sup>42</sup>, which is consistent with previously identified roles of prefrontal and/or top-down  
497 modulation from hierarchically higher areas in the cortex in supporting basic sensory mismatch  
498 processing in humans.<sup>60,61</sup> Our results here show steady activity in ACa axons in V1, time-locked  
499 to stimulus presentation, which do not show differential responses during the redundant vs control

500 vs deviant phases of the paradigm. This is also consistent with our past findings<sup>42</sup>. This is  
501 potentially perplexing: how can top-down inputs contextually modulate responses to a visual  
502 stimulus in V1 if those top-down inputs themselves appear indifferent to context?

503         One possible explanation is that the top-down inputs are carrying predictive information  
504 that is not evoked by the current stimulus, but is signaling what internal models would hold that  
505 the current stimulus could be. When the bottom-up signals – i.e., the inputs from thalamus/layer-  
506 4– concord with the top-down predictions from ACa, responses to the current stimulus may be  
507 attenuated. Our Granger analyses of LFP data are consistent with this interpretation, as ACa-to-  
508 V1 causal influence is strongest during redundant trials (when top-down and bottom-up are in  
509 concordance). On the other hand, when bottom-up and top-down do not match, as they would  
510 during the deviant stimulus, responses to the current stimulus are enhanced, leading to most of the  
511 V1 activity to be driven locally or in the bottom-up direction. Past work in primates suggests that  
512 bottom-up processing streams occupy lower theta-band frequencies, consistent with our finding  
513 (and others<sup>59,81,82</sup>) that theta (3-8Hz) power is strongest to the deviant stimulus. What follows  
514 from our hypothesis would be that during deviant stimuli, the direction of LFP causation should  
515 go from thalamus to V1, or from layer 4 to layer 2/3. Future work could test this with  
516 multielectrode recordings.

517         In further support of the interpretation that ACa axons are sending predictive information  
518 to V1 is that while the average of the magnitudes of input from ACa to V1 do not differ across  
519 contexts (oddball vs many-standards control Fig 3), the variance of activity across that population  
520 was wider during the oddball compared to the many standards control (Fig S2H,I). This suggests  
521 that activity of top-down inputs was more specific – including more clearly active and more clearly  
522 non-active ACa-V1 inputs – when the probability of the next stimulus was more certain (i.e. very

523 likely the redundant stimulus) compared to when the next stimulus could be one of 8 orientations  
524 (i.e. during the control paradigm). In the latter case, the activity of ACa-V1 inputs appeared to  
525 aggregate around more intermediate values. Interestingly, the variance of axonal activations did  
526 not differ between the redundant and the deviant stimuli during the oddball paradigm, further  
527 suggesting ACa-V1 inputs do not convey stimulus evoked activity (Fig 1D) back to V1, but, rather,  
528 they comprise anticipatory inputs containing the predictive information.

### 529 **Clinical implications**

530 Predictive processing and deviance detection hold significance in both basic and clinical  
531 neuroscience, as such functions are hypothesized to be disrupted in schizophrenia (SZ) and other  
532 psychotic disorders<sup>62</sup>. In human EEG recordings during a basic visual or auditory oddball  
533 paradigm, deviant stimuli elicit a pre-attentive mismatch negativity (MMN) event-related potential  
534 at mid-latencies (100-200ms) after the onset of a contextually deviant stimulus that, like the LFP  
535 DD signal we identify in this study, strongly correlates with increased oscillatory power in the  
536 theta band. People with SZ show reduced MMN and stimulus induced theta power to deviant  
537 stimuli<sup>59</sup>, and this biomarker is strongly correlated with cognitive symptoms in the disease<sup>58,63</sup>,  
538 suggesting that DD dysfunction could index core information processing deficits in SZ.

539 SZ involves neuropathological dysfunctions of prefrontal cortex (PFC)<sup>64-66</sup>, which weigh  
540 heavily in many leading theories of SZ pathophysiology<sup>67-69</sup>. However, neuropathology in basic  
541 sensory cortices<sup>64,70</sup> and deficits in sensory cortical processing – including auditory and visual  
542 domains – are also reliably present in the disease and are notably independent of cognitive or  
543 attentional modulation<sup>71-73</sup>. Such deficits could be just as crucial for explaining disease pathology  
544 and predictive processing deficits as prefrontal pathology<sup>74</sup>. By studying the dynamics of the  
545 homologous murine ACa-V1 circuit (ACa is a visually-projecting PFC region in mice), our results

546 might tie together these two lines of evidence to show how erroneous sensory processing can affect  
547 -- and be affected by-- dysfunction in regions higher in the cortical hierarchy like PFC, tertiary  
548 sensory regions, or parietal cortices. This prefrontal dysfunction then fails to provide the  
549 appropriate context to sensory areas, creating a disrupted loop of information processing and  
550 generating a schism between an internal model of the world and sensory inputs from the world.  
551 Specifically, our results suggest how top-down circuitry, alpha-band oscillatory disruptions, and  
552 cortical interneuron subpopulations could all contribute and relate to these core phenomenological  
553 features of the disorder.

#### 554 **Acknowledgments**

555 This work was funded by the National Eye Institute (R01EY033950, Hamm), National Institute of  
556 Mental Health (K99/R00MH115082, Hamm; F32MH125445, Ross), Brain and Behavior Research  
557 Foundation (YI30149; Hamm), and the Whitehall foundation (2019-05-443; Hamm).

#### 558 **Author Contributions**

559 JPH designed the study; GB, JTH, JMR, AMR, and CGG collected data; GB, JMR, and JPH  
560 analysed data; GB and JPH wrote the manuscript; All authors edited the manuscript; JPH and DSP  
561 conceptualized the work; JPH supervised the work; JPH, JMR, and DSP acquired funding.

#### 562 **Declaration of Interests**

563 The authors declare no competing interests.

564

#### 565 **Figures and legends**

566

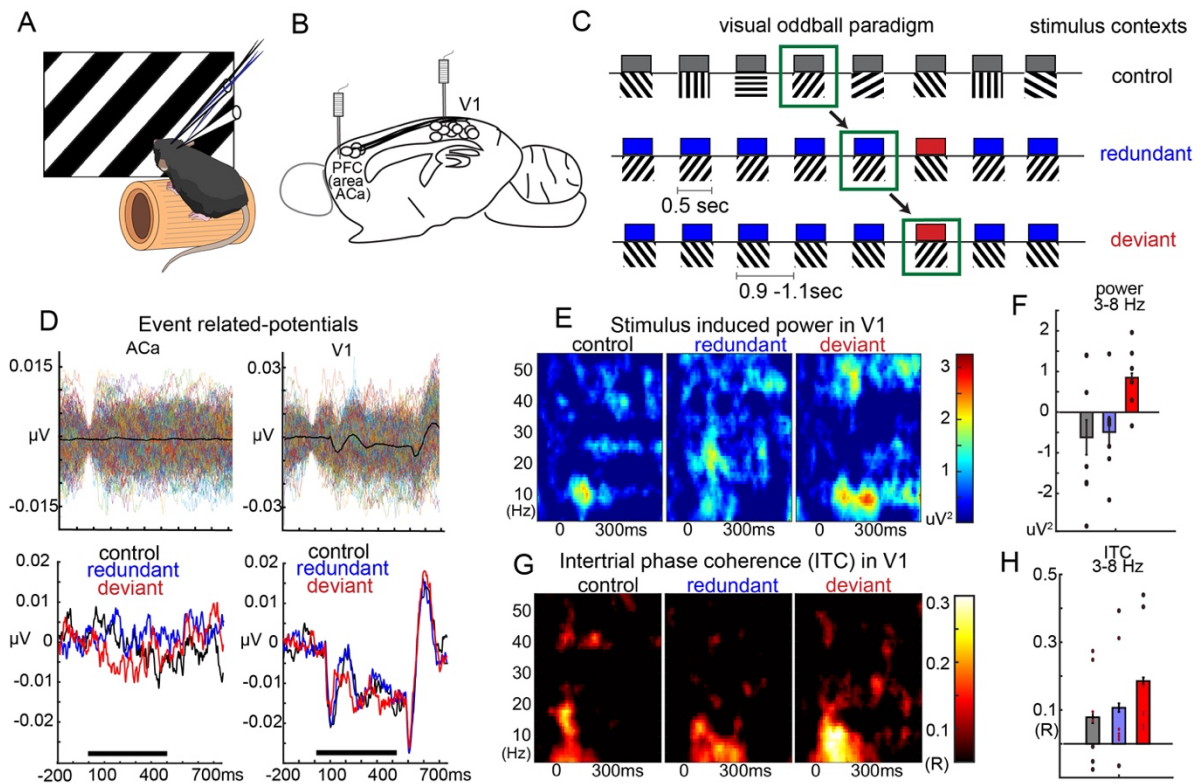

567 **Figure 1: Deviance detection in V1 power and phase dynamics during a visual oddball**

568 **paradigm.** A) Awake mice viewed full-field visual gratings during local field potential recordings

569 in B) V1 cortex and a prefrontal region that projects to V1: anterior cingulate area (ACa). C) Mice

570 viewed visual stimuli in a standard oddball, oddball flip, and many-standards control paradigm.

571 Visual responses to the same stimulus was tracked across three different contexts in which it was

572 redundant, deviant, and neutral (equiprobable). D) (top) individual trial-activity and trial-averaged

573 activity in ACa and V1 from a single mouse and (bottom) averaged over mice within each stimulus

574 context show that only V1 displayed clear visually evoked responses to the stimuli. E-F) Stimulus

575 induced power to the onset of the stimuli in control, redundant, and deviant contexts evince an

576 increase in theta-band power to the deviant stimulus. G-H) Stimulus elicited inter-trial phase

577 locking (ITC) to the onset of stimuli evince an early latency increase in theta-band ITC (main

578 effect of STIMTYPE, control vs deviant;  $F(1,6)=10.65$ ,  $p<.005$ ).



579

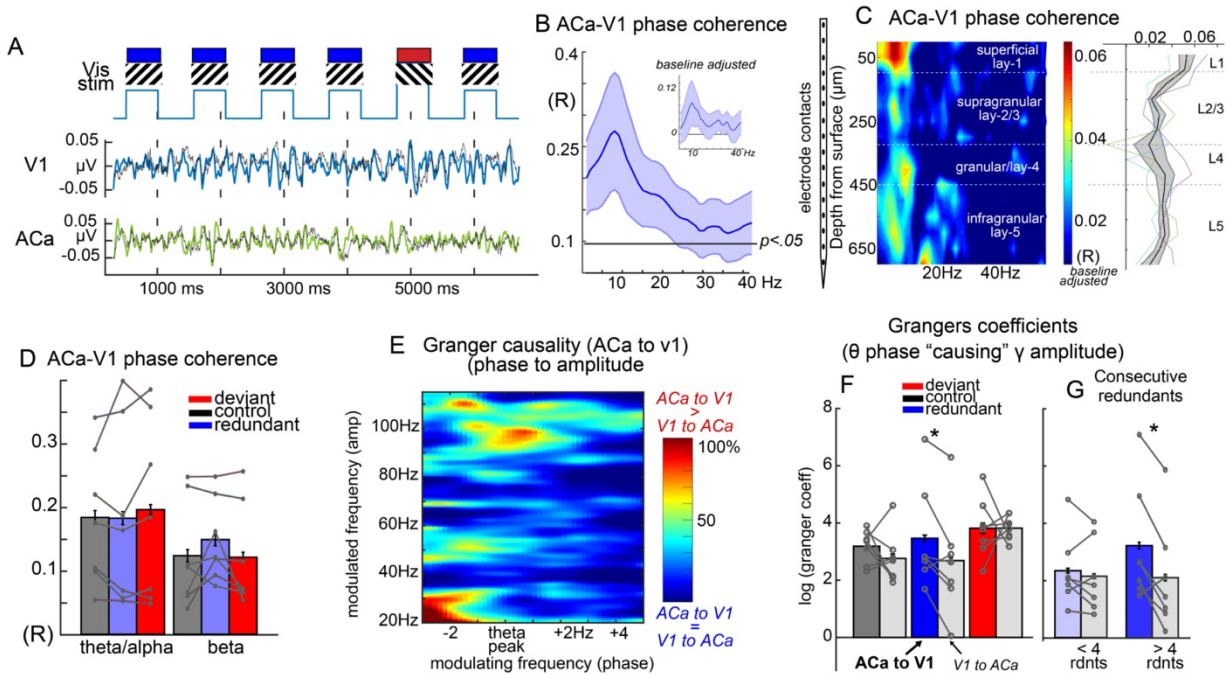

580 **Figure 2: Long range fronto-visual synchrony in the theta-alpha band during the oddball**

581 **paradigm.** A) Bipolar electrical recordings in V1 cortex and anterior cingulate area (ACa; in

582 mouse prefrontal cortex) displayed as ongoing unfiltered (black) and filtered local field potentials

583 in the theta/alpha band (8-13 Hz). B) Interregional phase synchrony quantified as 1-circ variance

584 (R-statistic) averaged across 7 mice and compared to randomized values at  $p < .05$ . Inset is

585 subtracting pre-run (prior to the start of visual stimuli) phase synchrony. Peak is at 9Hz and extends

586 to 20Hz. C) Recordings of a single ACa electrode combined with a multielectrode probe (16-

587 channels) in  $n=3$  mice, showing that Aca-V1 theta/alpha synchrony is strongest in layer 1, where

588 Aca-axons terminate in V1. D) Magnitude of interregional phase synchrony did not differ as a

589 function of stimulus type in theta/alpha (8-13 Hz) or beta (15-25 Hz) bands. (E) Granger

590 coefficients of how phase of peak theta in one brain region predicted gamma power in the other

591 region, indicating a power peak in the high-gamma frequency range, centered around peak-theta

592 phase. F) Bar plots and individual mouse (points) data from the peak region in (D) quantified for  
 593 control, redundant, and deviant stimulus conditions evince a stimulus type by direction interaction  
 594 ( $F(3, 24)=10.0, p<.01$ ). Only the redundant condition exhibited significantly stronger top-down vs  
 595 bottom-up granger causation ( $t(6)=2.57, p<.05$ ). (G) This directional difference was stronger after  
 596 4 redundant stimuli post deviant stimuli ( $t(6)=3.30, p<.05$  vs  $t(6)=0.97, p=.36$ ).

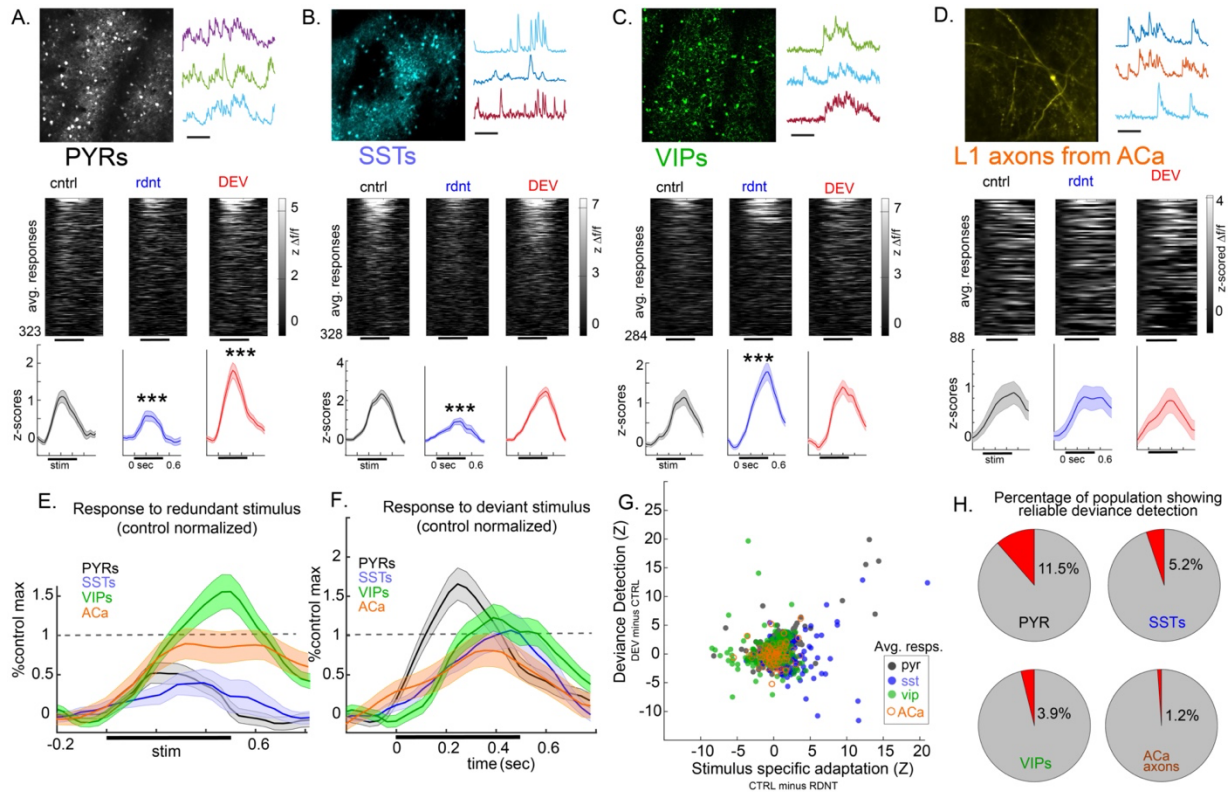

597  
 598 **Figure 3. Cell-type specific dynamics in the V1-ACa circuit during the oddball paradigm. A.**  
 599 Two-photon calcium imaging carried out in pyramidal neurons (PYRs; n=4 mice, scale bar= 15  
 600 sec) during a visual oddball paradigm; (middle) rasterplot of average responses to the same  
 601 stimulus when it is the control, the redundant (4<sup>th</sup> in sequence), and the deviant stimulus in context  
 602 (over 10 trials for each). Plotted are 323 “visually responsive” neurons; (bottom) averages across  
 603 neurons show significant stimulus specific adaptation (redundant vs control) and significant  
 604 deviance detection (deviant vs control). B) Same as A but for somatostatin positive neurons (SSTs;



605 n=8 mice; 328 neurons, 98% of recorded); (bottom) averages across SSTs show significant  
606 stimulus specific adaptation (redundant vs control) but not deviance detection (deviant vs control).  
607 C) Same as A, but for vasoactive intestinal peptidergic neurons (VIPs; n=9 mice; 284 neurons,  
608 93% of recorded); (bottom) averages across VIPS show significant *INVERSE* stimulus specific  
609 adaptation (redundant vs control) but not deviance detection (deviant vs control). D) Same as A,  
610 but for axon segments and boutons (regions of interest; ROIs) in layer 1 of V1 from putative ACa  
611 projection neurons (ACa; n=4 mice; 89 neurons, 89% of recorded); (bottom) averages across ACa  
612 ROIs show neither significant stimulus specific adaptation (redundant vs control) nor significant  
613 deviance detection (deviant vs control). E) Average responses to the redundant stimulus for each  
614 cell/ROI scaled relative to the maximum of the average response to the control stimulus within  
615 each cell/ROI-type. F) same as (E) but to the deviant stimulus. G) Scatterplot showing computed  
616 “DD” and “SSA” for each neuron. Different colors represent cell/ROI types. H) Percentage of each  
617 cell/ROI-type showing “true deviance detection”: i.e. response to deviant is largest and is more  
618 than 1.67 standard deviations larger than response to control stimulus in two separate sets of trials  
619 (5 even vs 5 odd trials). The estimate for PYRs is consistent with our past work<sup>42</sup>. \*\*\*p<.005  
620

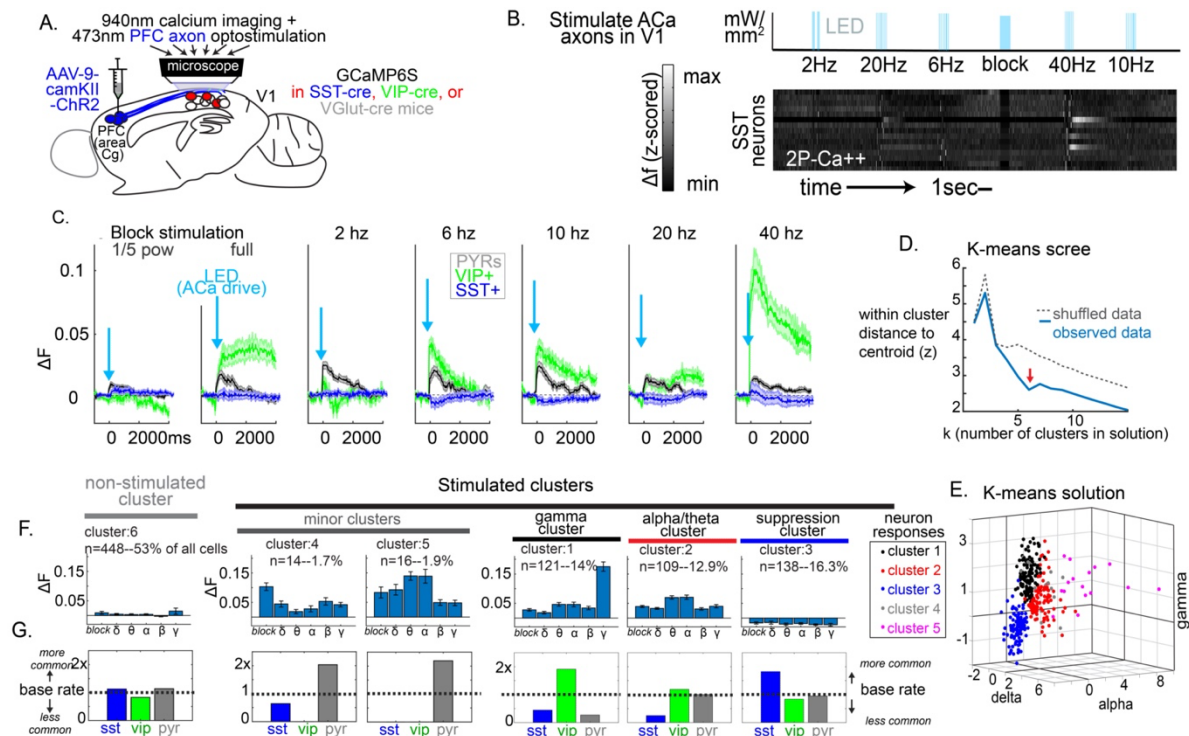

621 **Figure 4. V1 activation by Aca is frequency and cell-type specific.** A) a cre-dependent  
 622 AAV transducing excitatory ChR2 was injected into Aca (a prefrontal area projecting to V1) of  
 623 mice expressing GCaMP6S in PYR, VIP, or SST interneurons. Activity of PYRs, VIPs, or SSTs  
 624 was imaged in V1 while B) 1 second bursts of 473 nm light illuminated the imaging column to  
 625 activate Aca axons at 2-, 6-, 10-, 20-, or 40-Hz, a power-normalized “weak” block stimulation,  
 626 and a full-power block stimulation. C). The activity of V1 cells during frequency-specific driving  
 627 of Aca-inputs differed among VIPs, SSTs, and PYRs ( $F(10,4035)=9.60$ ,  $p<.001$ ). During 6 and  
 628 10-Hz stimulation (theta and alpha), SSTs and PYRs differed from VIP interneurons, with VIPs  
 629 increasing and SSTs decreasing below baseline (all  $p<.001$ ). During gamma stimulation, SSTs and  
 630 PYRs also differed from VIPs, with VIPs showing dramatic responses on average and PYRs and  
 631 SSTs showing moderate positive responses (all  $p<.001$ ). D) Cell responses for all stimulation  
 632 conditions (except weak) were standardized and had their dimensions reduced to 5 (PCA); a 1000  
 633 k-means analyses was carried out on real and shuffled data (shuffled within cells, across PC

634 dimensions). At each iteration, we quantified the median “within cluster distance from centroids”  
635 to determine the quality of the clustering solution. Our data supports the presence of 6 stimulation  
636 clusters. E) We plotted this as a scatterplot for delta (2 Hz), alpha (10 Hz), and gamma (40 Hz),  
637 excluding the cluster with no strong Aca-drive (about half of the cells). F) We took the average  
638 centroid locations across these 6 clusters and computed their average responses to each Aca-  
639 stimulation condition. This included a non-stimulated cluster and 5 stimulation clusters. All 5  
640 stimulation clusters showed significantly different activity to 10 Hz drive compared to block (non-  
641 oscillatory) stimulation ( $p < .01$ ) except the suppression cluster. G) We plotted for each cluster the  
642 proportion of SSTs, VIPs, and PYRs relative to the overall proportion of these cells in the overall  
643 dataset. The three major stimulation clusters all comprised greater than 12% of imaged neurons  
644 each, and showed marked differences in proportion across SSTs, VIPs, and PYRs, with a gamma  
645 stimulation cluster including VIPs (which also showed significant alpha-drive) and a suppression  
646 cluster including mostly SSTs.

647

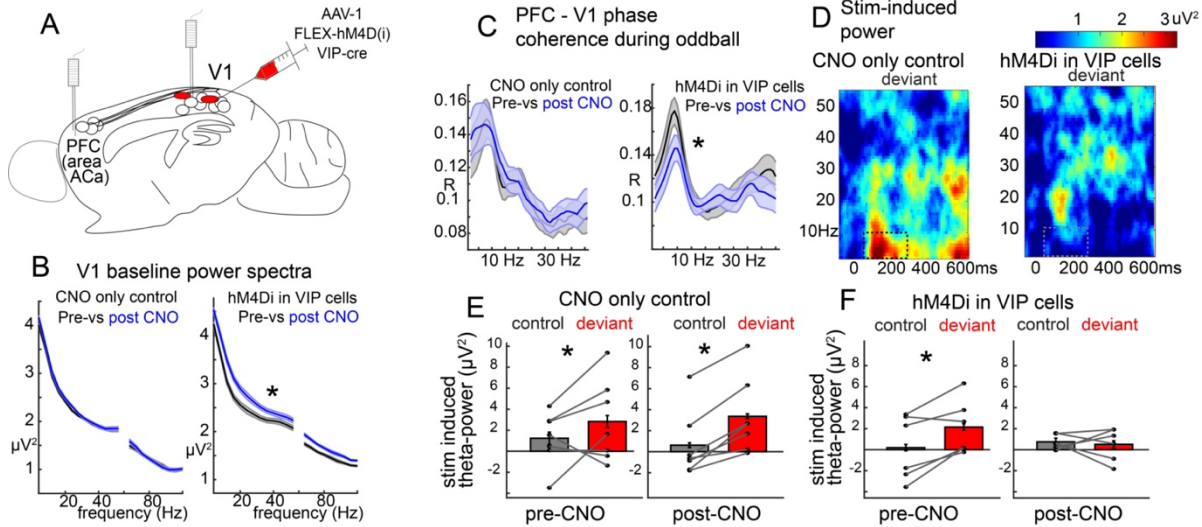

648 **Figure 5. Chemicogenetic suppression of VIP-neuron activity in V1 eliminates fronto-**  
 649 **visual synchrony and visual deviance detection.** A) a cre-dependent AAV transducing inhibitory  
 650 DREADDs into VIP-positive interneurons in V1 in a VIP-cre mouse. Local field potentials were  
 651 recorded in Aca and V1. B) VIP interneuron suppression increased broadband power at baseline  
 652 (inter-stimulus intervals). The same effect was not seen in a CNO-only condition (left;  
 653 CNOxCONDITION interaction effect  $F(1,11)=5.08, p<.05$ ). C) VIP interneuron suppression  
 654 decreased interregional phase-synchrony during the stimulus period of the oddball paradigm. The  
 655 same effect was not seen in a CNO-only condition (left; CNOxCONDITION interaction effect  
 656  $F(1,11)=5.02, p<.05$ ). D) Stimulus induced power spectra to the deviant stimuli post-CNO for the  
 657 CNO-only control (left) and the VIP suppression condition (hM4D(i) in VIP interneurons; right).  
 658 E,F) Stimulus induced theta-band (3-8 Hz) power from boxes in (D), points represent mice  
 659 (CNOxCONDITIONxSTIMTYPE interaction effect  $F(1,11)=7.10, p<.05$ ).

660

661

## 662 **Methods**

### 663 Animals, Surgery, and Training

664 Experiments were carried out under the guidance and supervision of the Georgia State  
665 University (GSU) Division of Animal Resources and were approved via Institutional Animal Care  
666 and Use Committee (IACUC) at GSU. Adult C57BL/6 mice (n=47, P60 to P120, from Jackson  
667 Laboratories) were used. Transgenic lines were made using mice expressing cre-dependent  
668 GCaMP6s (tm162(tetO-GCaMP6s, CAG-tTA2)) crossed with tm1.1-(VGluT-), SST- and VIP-cre  
669 lines.

670 For experiments involving calcium imaging, head-plate fixation and craniotomy surgeries  
671 were carried out together as previously described<sup>75</sup>. A hole with diameter of 3 mm was drilled in  
672 the mouse skull in left V1 (coordinates from bregma: X =2 mm, Y = -2.92 mm), followed by the  
673 removal of the skull and exposure of brain surface; dura matter was conserved. A cover glass was  
674 placed and sealed at the hole location. Then a titanium head-plate was attached to the mouse head  
675 to allow for their fixation on the microscope. For calcium imaging or optogenetic manipulation of  
676 Aca axons, virus injections were done 2 to 3 weeks prior to head-plate fixation and craniotomies.  
677 a small hole was drilled in the mouse left Aca (coordinates from bregma: X =0.35 mm, Y = 1.98  
678 mm , Z = 0.9 mm from brain surface); a micro-syringe attached to a stereotaxic apparatus was used  
679 to inject 0.75 ul of a 1:1 solution of PBS and channelrhodopsin (pAAV9-CaMKIIa-  
680 hChR2(H134R)-mCherry) or GCaMP6s (pAAV.Syn/Cag.GCaMP6s.WPRE.SV40) over a 10  
681 minute period (0.075  $\mu$ l/min) to each mouse.

682 For local field potential experiments, head-plate attachment was carried out prior to  
683 electrode implantation. During the latter, two bipolar electrodes twisted together (with contacts  
684 spaced approximately 200  $\mu$ m apart) were inserted 0.5 mm below the dura in stereotaxically  
685 defined Aca and V1 (coordinates from bregma: Aca, X =0.35 mm, Y = 1.98 mm; V1, X =2 mm,  
686 Y = -2.92 mm), and grounded on the skull contralateral to the target areas, totaling 4 contacts for

687 each region (two at target, two grounded). For experiments with LFP and VIP chemicogenetic  
688 suppression, 0.75  $\mu$ l of 1:1 diluted AAV8-hSyn-DIO-hM4Di-mCherry was injected in V1 starting  
689 at 0.9 mm deep and moving up to 0.5 mm from the brain surface continuously during the whole  
690 injection period (at a rate of 0.04 mm/min) to assure an even and widespread expression of the  
691 virus. Injections were done in VIP-cre mice at the same time as head-plate fixation. All animals  
692 that went through surgery were anesthetized using 3% isoflurane and received pre and post care  
693 medication appropriately (5 mg/kg carprofen, IP). Prior to recordings, mice underwent at least 3  
694 training sessions to acclimate them to head-fixation and the visual stimuli, as previously described  
695 <sup>76</sup>.

#### 696 Visual Stimulation

697 Visual stimulation was presented on a flat TV screen at a 45° angle from the animal axis,  
698 approximately 15 cm from the eye, using Psychophysics Toolbox on MATLAB (Mathworks).  
699 Full-field, black and white, sinusoidal moving gratings were presented at 100% contrast, 0.08  
700 cycles per degree, two cycles per second, at 8 possible orientations (30°, 45°, 60°, 90°, 120°, 135°,  
701 150°, and 180°). Stimuli were presented for 500 ms, with an inter-stimulus interval of 500 ms of  
702 black screen. A “many standards control” (equally rare, randomly presented stimuli at all 8  
703 possible orientations) was presented before each oddball trial to establish baseline activity. The  
704 oddball trials consisted of a repetitive sequence of one stimulus (“redundant”, either 30°, 45°, or  
705 60° degree angles, presented 87.5% of the time), followed by a stimulus of a different orientation  
706 (“deviant”, 120°, 135°, or 180° degree angles, presented 12.5% of the time). At the latter half of  
707 the trial, the redundant stimulus is “flipped” to become the deviant, and vice versa (“oddball flip”);  
708 this way we can assess responses to the stimulus context -i.e. when in the paradigm it is shown-  
709 rather than stimulus features -i.e. what orientation it is.

710 Optogenetics experiments.

711 One second bursts of 473 nm light delivered through an LED (Bruker optogenetics module)  
712 was focused to 100  $\mu\text{m}$  below V1 to activate Aca axons at 2-, 6-, 10-, 20-, or 40 Hz (20% duty  
713 cycle, squarewave pulses; .5 mm radius; 12 mW per  $\text{mm}^2$  at the surface), a power-normalized  
714 “weak” block stimulation (delivering the same overall power per second as the rhythmic  
715 stimulations – 2.4 mW per  $\text{mm}^2$ ), and a full-power block stimulation (1 second of 12 mW per  
716  $\text{mm}^2$ ). These seven conditions were carried out in random order and interspersed with 9 seconds  
717 of rest between them, and each condition was repeated 10 times. No visual stimulus was shown in  
718 this run. A black tape was placed around the objective to prevent spillage of the blue light into the  
719 animal’s eyes. Virus expression and stable drive of these neurons were confirmed via histology  
720 (Fig S3A,B) and LFP recordings in Aca during V1 drive (Fig S3E-H).

721 Recordings

722 Two-photon microscopy (28 Hz framerate; Bruker Investigator laser scanning microscope;  
723 Bruker Corporation, Billerica, MA, USA) excited by a laser (Chameleon Ultra II, Coherent Inc,  
724 Santa Clara, CA, USA) at 920nm wavelength were used to image the fluorescent calcium sensor  
725 GcAMP6s expressed in PYRS, VIPS, SST cells and Aca axons at the visual cortex of mice. The  
726 laser beam was modulated with a Pockels cell (Conoptics 350-105, with 302 RM driver) and  
727 scanned with galvanometers through a water immersion objective (16X/0.80W, Nikon, Tokyo, JP).  
728 The objective lens were place on top of the animals head while a small volume of Aquasonic  
729 ultrasound gel (Parker Laboratories Inc) was placed at the site of the cranial window to bridge the  
730 objective with the imaging area and allow stability over long-duration sessions. The animals were  
731 awake, head-fixed to the microscope by their headplate, while sitting on top of a wheel free to



732 move forward and backwards. All recordings were carried out in a dark room with the researcher  
733 present to monitor mouse wakefulness and check for signs of discomfort. Each run had a duration  
734 between 6-7 minutes. Scanning and imaging were done through Prairie View (Prairie  
735 Technologies) software (resonant galvo, downsampled to 28 frames per second, for 256x256  
736 pixels, 3.136  $\mu\text{m}$  pixel size, 802.9 x 802.9  $\mu\text{m}$  field of view). A time series was recorded using  
737 Prairie View software as the mice observed visual stimuli or received opto-drive. Visual stimulus  
738 was transmitted to the monitor through an HDMI cable. The visual stimulus was converted to  
739 voltage traces and connected to the computer for stimulus recording through the Voltage  
740 Recording tool on Prairie View. Time series and stimulus voltage traces were synchronized at the  
741 onset of recording for proper alignment of neuronal activity and stimulus presentation. Optogenetic  
742 drive waveforms were converted to voltage traces and recorded at Prairie view in a similar fashion,  
743 with the signal being transmitted both to the light-stimulation driver and the computer. For PYRS,  
744 VIPs and SST recordings, images were taken 100  $\mu\text{m}$  to 350  $\mu\text{m}$  deep, aiming at layer 2/3 of the  
745 mouse cortex. For Aca axons, recordings took place at 50-100  $\mu\text{m}$  deep, aiming at layer 1 of  
746 mouse cortex.

747 For the LFP experiments, the mouse was fixed to the recording apparatus through their  
748 head-plate and free to move back and forth. Insulated cables were connected to the electrodes on  
749 the top of the head of the animal and plugged into a differential amplifier (Warner instruments,  
750 DP-304A, high-pass: 0 Hz, low-pass: 500 Hz, gain: 1K, Holliston, MA, USA). Amplified signals  
751 were passed through a 60 Hz noise cancellation machine (Digitimer, D400, Mains Noise  
752 Eliminator, Letchworth Garden City, UK), which, instead of filtering, creates an adaptive  
753 subtraction of repeating signals which avoids phase delays or other forms of waveform distortion.  
754 Multielectrode probe LFPs (Fig 2C) were recorded from a custom designed 16-channel



755 NeuroNexus probe (750  $\mu\text{m}$  length, 50  $\mu\text{m}$  inter-contact distance; A1 $\times$ 16–3 mm 50–177; Ann  
756 Arbor, MI) inserted perpendicularly into left V1 at 100  $\mu\text{m}/\text{min}$  until the dorsal-most electrode was  
757 just below the dura (deduced from real-time signals). Prior to insertion, probes were submerged in  
758 DiI dye for post-hoc anatomical validation. These LFP data were acquired from 0.1–7500 Hz upper  
759 and lower bandwidths, sampled at 10 kHz, and then low-pass filtered at 150 Hz and resampled at  
760 1 kHz for preprocessing. Electrophysiology activity was recorded using the Prairie View software  
761 or with an Intan Recording system (multielectrode recordings). Visual stimulus timings were  
762 recorded as voltage traces at the same time as the LFPs signals for proper alignment, and the timing  
763 of these stimuli relative to LFP recording was confirmed with photodiodes placed on the video  
764 monitor. For VIP suppression, as soon as the first recordings were done, the animals were injected  
765 with CNO (IP, 5 mg/kg)<sup>11</sup> and recorded again after 30 min of downtime.

#### 766 Two photon image processing.

767 Videos were corrected for motion using the “moco” plugin on ImageJ<sup>77</sup>. Cellular activity  
768 was semi-manually scored using an in-house built script on MATLAB, as previously described<sup>76</sup>.  
769 Mean and standard deviation were calculated for all image frames and plotted for reference;  
770 rectangular sessions were manually selected around cell bodies/axon segments through a GUI in  
771 MATLAB. A PCA analysis was performed within the selected regions of interest (ROIs) to select  
772 the pixels with weights at least 80% of the maximum of the first PCA component as the final ROI,  
773 then plotted as an average fluorescence across pixels. The fluorescence time courses were  
774 displayed after each selection to verify stability across imaging experiments and healthy calcium  
775 transients. Halo subtraction was performed in the selected ROIs to exclude excess fluorescence  
776 from nearby cells. For scoring axonal/bouton ROIs, datasets were first downsampled to 9.4 frames  
777 per second to aid in scoring and detection. This is consistent with our past analysis<sup>42</sup> and was

778 necessary due to the fact that such small ROIs have faster transients and smaller signal to noise  
779 ratios. For analysis, time-courses were re-interpolated to 28 frames per second for comparison with  
780 other cell types (PYRs, VIPs, SSTs). Effectively this was equivalent to a 3 sample gaussian  
781 smooth. For axon segments and boutons, we attempted to exclude ROIs originating from the same  
782 cell (i.e. i.e. we focused those which were apparently functionally independent). That is,  
783 segment/bouton pairs showing highly similar ( $r > .7$ ) activity were assumed to originate from the  
784 same cell, and thus were combined or not included (if one was less stable than the other over the  
785 imaging period).

786 The fluorescence traces from the resulting ROIs of soma (PYRs, VIPs, SSTs) or axons  
787 (from Aca) were converted to  $\Delta F$  through a regression based smoothing approach (3-second  
788 lowess envelope)<sup>76</sup>. The first discrete derivative was calculated as a proxy for neuronal activity.  
789  $\Delta f$  was z-scored within each neuron using the bottom 8% of signals across each run and then  
790 averaged across trials for each stimulus type. Only stimulus-driven cells (cells with  $> +1$  standard  
791 deviation above pre stimulus baseline on at least one stimulus type) were considered for analysis.

792 For imaging cells during optostimulation, a slightly different quantification was used after  
793 the ROI extraction. Frames during which the opto-stimulus was delivered were identified by the  
794 presence of saturation artifacts in the imaging dataset. These frames and 1 frame before and after  
795 were discarded from further analyses (1.07 seconds). In contrast to the scoring of neural activity  
796 during the oddball paradigm (above), we were unable to quantify fast transient onsets in these  
797 experiments (because they started during opto-artifact). We utilized the slower decay time of the  
798 GCaMP6s calcium transients in the time period immediately following the opto-stimulation train.  
799 We quantified the average fluorescence value in the 1-second after stimulation and subtracted the  
800 eighth percentile of fluorescence in the 5 seconds occurring prior to the opto-stimulus (the

801 baseline), and then divided the result by this baseline  $(\Delta F/F)^{78,79}$ . These responses of V1  
802 neurons were averaged across 7-10 trials within each stimulation condition.

### 803 Local field potential signal processing and analysis.

804 Trials with excessive signal ( $>\approx 5$  std devs) in either V1 and Aca were manually excluded  
805 (between 0 and 20). All analyses were limited to the last 10 control trials and the first 10 deviants  
806 of each orientation (two per mouse). We used the 4<sup>th</sup> redundant in each sequence after each deviant  
807 (also 10 total for each orientation). Analyses were combined across both orientations, as local field  
808 potential responses in mouse V1 are known to not exhibit significant orientation selectivity<sup>80</sup>. Trial  
809 averaged evoked responses to a given stimulus in the control, redundant, and deviant contexts were  
810 generated for each mouse and averaged over mice (Fig 1) for descriptive purposes only. Ongoing  
811 data were converted to the time-frequency domain with a modified morelet wavelet approach with  
812 100 evenly spaced wavelets from 1 to 120 Hz, linearly increasing in length from 1 to 20 cycles per  
813 wavelet, applied every 10 ms from 300 ms pre- to 700 ms post stimulus onset (200ms post-stimulus  
814 offset) as previously described<sup>11</sup>. Stimulus induced power spectra (1-120 Hz) were computed for  
815 all three conditions (control, redundant, deviant) for each mouse and baseline corrected by  
816 subtracting the average for each frequency in the 100 ms prior to stimulus onset. Statistical  
817 analyses focused on identifying signatures of deviance detection (deviant vs control) in the low-  
818 theta band induced power and phase locking during the stimulus period, as this band has been  
819 previously shown to track deviance detection in rodents and humans<sup>11,59,81,82</sup>.

820 Interregional phase synchrony was quantified by taking the phase difference for each  
821 frequency (1-40 Hz) between Aca and V1 for all measurements from 100 ms pre- to 100ms post-  
822 stimulus offset (separately for control, redundant, and deviant trials) and calculating the 1-circ

823 variance (R-statistic) of these lags. We averaged these values compared to the random distribution  
824 at  $p < .05$ <sup>83,84</sup>.

825 To determine the directionality of the peak phase synchrony between regions ACa and V1,  
826 granger causality analyses was employed to focus on how theta-phase in one region predicted high  
827 gamma-power in the other region at  $1/8^{\text{th}}$  of a theta-cycle in the future<sup>85</sup>. We focused on each  
828 recording's "peak" theta (the theta frequency with the greatest ACa-V1 synchrony – ranging from  
829 4 to 12 Hz) and high gamma-power (80-120 Hz) as this reflects synchronous, highly local neuronal  
830 activity<sup>28,47</sup>. Briefly, gamma-power in region A at timepoint "t" is treated as a criterion variable X,  
831 and is first regressed on gamma-power in region A at timepoint "t minus lag". Then, theta-phase  
832 in region B at timepoint "t minus lag" is added to the model, and the change in  $R^2$  is quantified as  
833 an F-value – the so-called "Granger coefficient". These "Granger coefficients" were log-  
834 transformed and quantified for both directions (ACa to V1 ["top-down"] and V1 to ACa ["bottom-  
835 up"]) for all timepoints and trials from 100 pre- stimulus to 100ms post stimulus offset for all mice,  
836 and averaged within conditions (control, redundant, deviant).

### 837 Calcium imaging data analysis.

838 For analyzing cell-level responses during the oddball paradigm, calcium imaging analyses  
839 were limited to the 10 trials in each condition (control, redundant, deviant) as described above (due  
840 to locomotion and field-of-view drift artifacts). We generated stimulus triggered averages for each  
841 neuron recorded for each of the three conditions. If a given neuron responded greater than 1.67  
842 standard deviations above the pre-stimulus baseline activity for any one condition and any one of  
843 the orientations, we included it in subsequent analyses (between 80% and 98% of neurons imaged).  
844 Responses to only 1 oriented stimulus for each neuron (the strongest after averaging across  
845 contexts) were analyzed. We determined significant stimulus specific adaptation and deviance

846 detection at the population level within each cell class (PYRs, VIPs, SSTs, Aca-axons) statistically  
847 as described below. Further, for each cell class, we calculated the proportion of cells showing “true  
848 deviance detection”: i.e. response to deviant is largest and is more than 1.67 standard deviations  
849 larger than response to control stimulus in two separate sets of trials (5 even vs 5 odd trials). For  
850 analyzing DD and SSA as a function of a cell’s orientation selectivity index (OSI) and selectivity  
851 relative to the orientation of the test stimulus, we quantified OSI as 1-circular variance<sup>86,87</sup> on the  
852 control trials not used for the main analysis (i.e. the 10-15 trials for each of 8 orientations prior to  
853 the final 10). Cells with greater than 0.2 OSI were considered selective. Preferred orientation for  
854 each cell was estimated as the phase of the average vector, generated by averaging all responses  
855 to the 8 different orientations.

856 For the optostimulation experiments, we used only runs without significant  
857 locomotion/movement artifact, including 7 to 10 trials per stimulation condition (weak, strong-  
858 block, 2-Hz, 6-Hz, 10-Hz, 20-Hz, 40-Hz). Average delta-f in the 1 second period after the LED  
859 was turned off, averaged across trials within each condition, was used for statistical analyses (see  
860 below). Each cell was an observation, and PYRs, VIPs, and SSTs were included as separate groups  
861 in a frequencyXcell-class ANOVA to determine whether significant effects of Aca stimulation  
862 frequency were present that differed across cell class.

### 863 K-means clustering analysis of optostimulation responses.

864 Responses of V1 neurons were averaged across 7-10 trials within each stimulation  
865 condition and combined regardless of cell class into a cells by stim stimulation condition matrix  
866 (except weak, which showed very low responses for most cells and was excluded from the k-means  
867 analysis). This 845 X 6 matrix was reduced to 845 X 5 with a principle components analysis (based  
868 on a scree-plot). We then carried out 1000 k-means analyses on real data and on shuffled data

869 (shuffled within cells, across PC dimensions) for  $k=2-15$  ( $k$ =number of clusters). At each iteration,  
870 we quantified the median “within cluster distance from centroids” to determine the quality of the  
871 clustering solution. We averaged these values for each value of  $k$ , creating a “scree” plot which  
872 shows how much each additional cluster adds to the solution. The point at which this curve  
873 becomes linear and parallel with the shuffled data suggests that additional clusters are no-longer  
874 necessary. This analysis suggested that our data supports the presence of 6 stimulation clusters.  
875 We took the average centroid locations across these 6 clusters (on the non-standardized, raw data)  
876 and computed their average responses to each ACa-stimulation condition. We plotted for each  
877 cluster the proportion of SSTs, VIPs, and PYRs relative to the overall proportion of these cells in  
878 the overall dataset. We specifically tested whether the 10 Hz condition differed from the block  
879 stimulation for each cluster with a paired t-test on the cells in the cluster of interest (two-tails).

#### 880 Locomotion Detection

881 Videos of mice during experiments were recorded at 30 fps during each experiment via a  
882 Logitech C920 HD Pro webcam mounted  $\approx 20$  cm away from the mouse’s face, illuminated by a  
883 dim 617 nm LED. Wheel motion, a surrogate of mouse locomotion, was calculated on a frame by  
884 frame basis post-hoc by singular value decomposition of manually selected ROIs using the open-  
885 source Facemap software<sup>88</sup>. Locomotion was binarized and analyzed similarly to LFP data, as  
886 stimulus-triggered averages C, R, and D (figure S1).

#### 887 Statistics

888 For LFP experiments, we carried out mixed-ANOVAs on the measures of interest at the  
889 mouse level (one measurement per mouse) with stimulus type (CONTROL, REDUNDANT,  
890 DEVIANT) and/or CNO- (PRE, POST) as within subjects factors and GROUP (hM4D(i),  
891 CONTROLS) as a between subjects factor. Significant interactions were carried out with t-tests

892 (two-tailed). For calcium imaging experiments, we carried out repeated-measures or factorial  
893 ANOVAs on the measures of interest at the cell level with stimulus type (CONTROL,  
894 REDUNDANT, DEVIANT) or STIMULATION FREQUENCY (block, 2-, 6-, 10-, 20-, or 40-Hz)  
895 as within subjects factors. Significant effects were carried out with t-tests (two-tailed), focusing  
896 on planned contrasts between i) control and redundants (which tests for “stimulus specific  
897 adaptation”) and ii) controls and deviants (which tests for “deviance detection”) as previously  
898 described.

899

## 900 Supplemental Figures

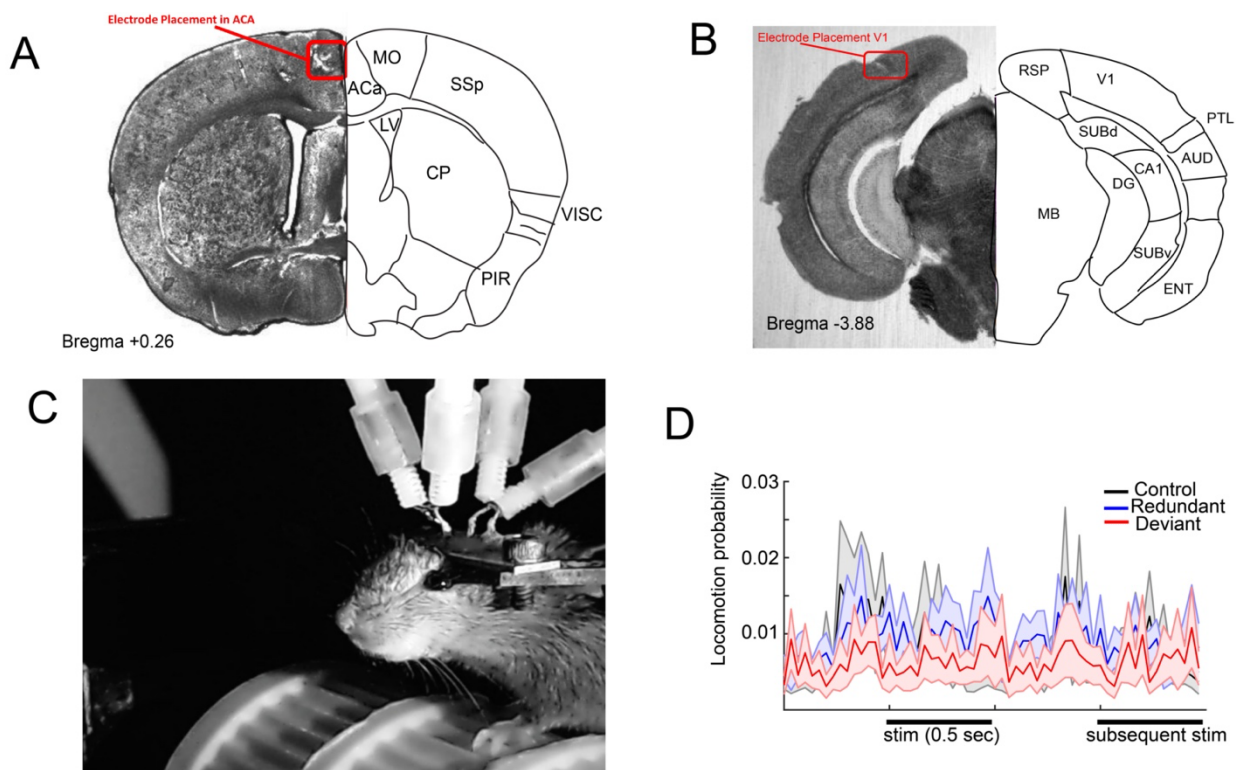

901

902 **Figure S1. Neither deviant nor redundant stimuli evoke changes in locomotion.** A)

903 Example of anatomical confirmation of electrode placements in ACA and B) V1 was completed



904 after recordings. C) Videos of mice during recordings were used to ensure the mouse was alert and  
 905 electrodes/objectives were stable during the length of the recording, and were also used to quantify  
 906 locomotion by selecting an ROI over the mouse treadmill and binarizing frames with locomotion  
 907 in a subset of mice (n=14). D) Locomotion probability across trials was not different between  
 908 stimulus contexts in the pre-stimulus period ( $F(2,12)=0.73$ ,  $p=.49$ ) or during the stimulus  
 909 ( $F(2,12)=0.37$ ,  $p=.69$ ), nor were any t-tests between individual stimulus contexts (e.g. deviant vs  
 910 control) significant in post-hoc analyses (all  $p>.45$ ).

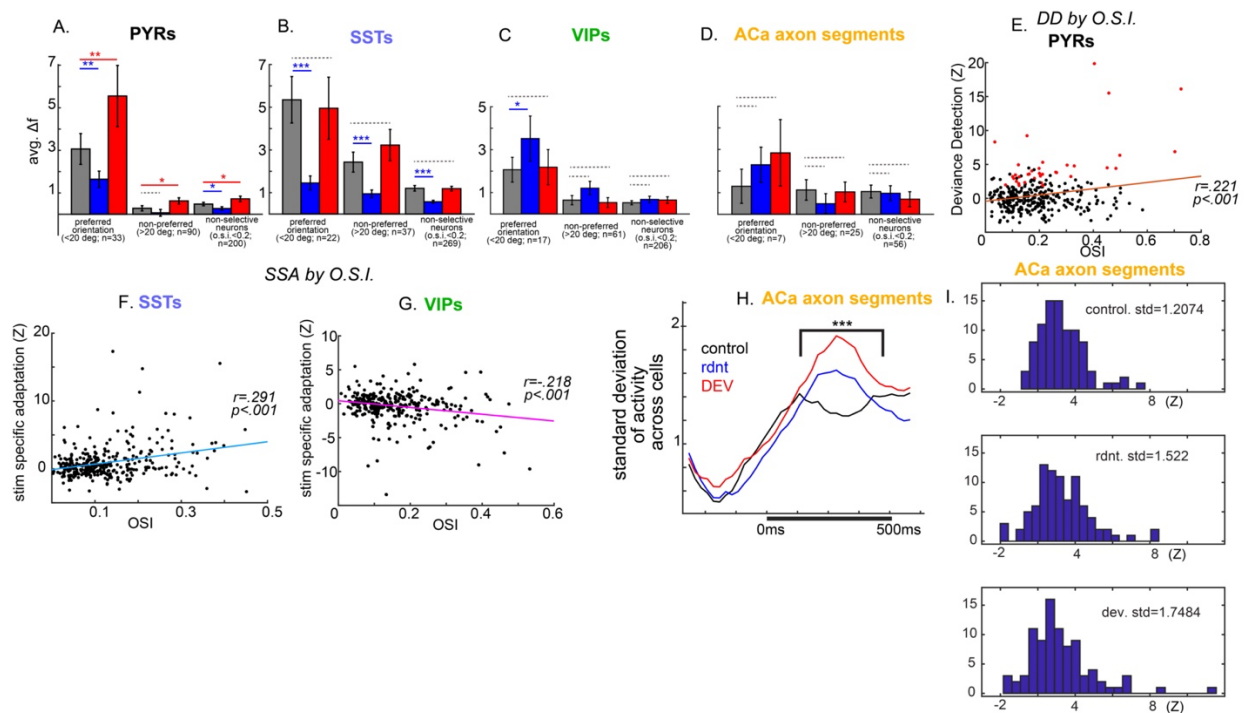

911 **Figure S2. Deviance detection and stimulus specific adaptation by feature selectivity**  
 912 **by cell-type.**

913 **A)** Pyramidal neurons displayed statistically significant deviance detection (DD)  
 914 regardless of the cells preference for the orientation of the stimulus (one-tailed paired t-test, t-  
 915 preferred (31)=2.63,  $p<.01$ ; t-non-preferred(88)=1.82,  $p<.05$ ), and in cells with low/absent  
 916 orientation selectivity (t-non-selective (198)=1.81,  $p<.05$ ). For stimulus specific adaptation (SSA),  
 917 PYR responses to their preferred orientation (one-tailed paired t-test, t-preferred (31)=-2.93, $p<.01$ )  
 918 or non-selective PYRs (t-non-selective (198)=-1.86,  $p<.05$ ) showed significant SSA. The lack of

919 SSA to non-preferred stimulus in PYRs was likely due to floor effects, as responses to the control  
920 stimuli were already quite low. B) Neither selective nor non-selective SSTs showed significant  
921 DD, but all three groups showed significant SSA (one-tailed paired t-test, t-preferred (20)=-3.91,  
922  $p<.001$ ; t-non-preferred(35)=-3.72,  $p<.001$ ; t-non-selective (297)=-5.21,  $p<.001$ ). C) Neither  
923 selective nor non-selective VIPs showed significant DD or significant SSA. Interestingly, upon  
924 examination, selective VIPs showed statistically significant inverse SSA to their preferred  
925 orientation (two-tailed paired t-test, t-preferred (15)=2.19,  $p<.05$ ) and trend-level inverse SSA to  
926 their non-preferred orientation ( $t(61)=1.62$ ,  $p=.11$ ). D) Axonal segments from ACa neurons  
927 projecting to V1, did not show significant DD or SSA, regardless of the cells selectivity or stimulus  
928 preference. E) DD in PYRs was modestly but significantly correlated with orientation selectivity  
929 (1-circ variance). Still, many cells showing low orientation selectivity showed reliable DD (red  
930 cells in plot). DD was not correlated with orientation selectivity in SSAs, VIPs, or ACa axonal  
931 segments. F) SSA in SSTs was modestly but significantly correlated with orientation selectivity  
932 (a similar effect was observed in PYRs, not shown), while G) SSA in VIPs was inversely correlated  
933 with orientation selectivity, suggesting that more selective VIP neurons actually produced stronger  
934 responses to predictable stimuli. H,I) Although ACA axons in V1 do not show differences in  
935 average activity levels between control and oddball paradigms (see Fig 3 in text), they do exhibit  
936 increased standard deviation across population responses during the oddball paradigm, during both  
937 redundant and deviant trials, relative to control. This suggests that the overall nature of information  
938 being sent to V1 during the oddball paradigm is different than during the control.

939

940

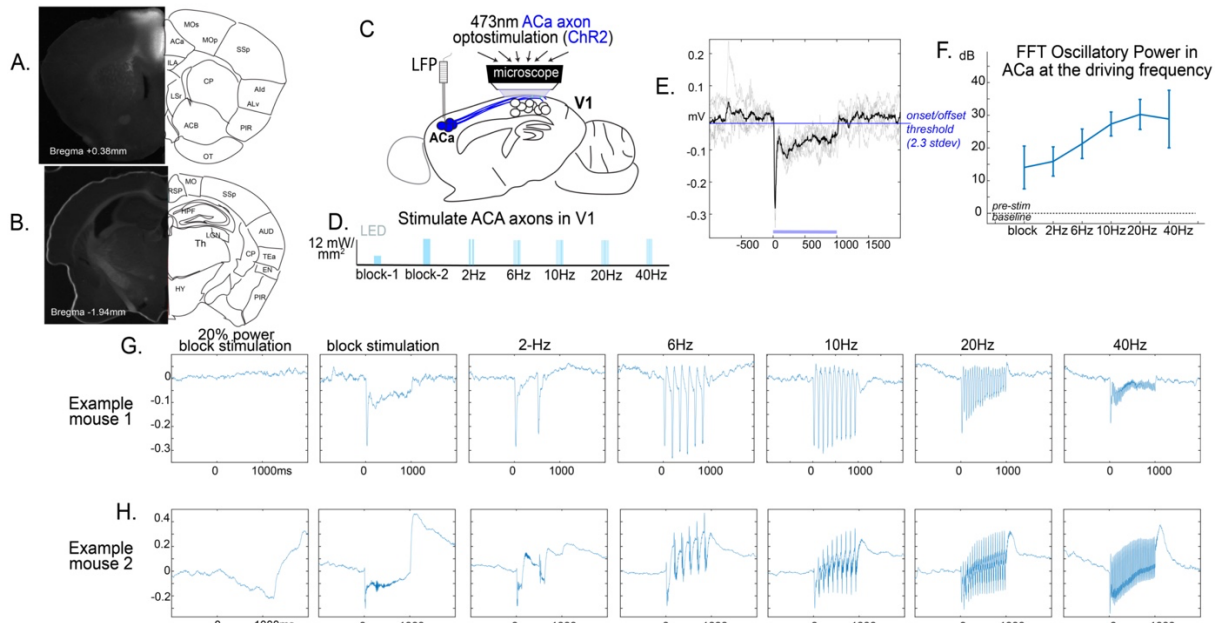

941  
942

**Figure S3. Electrophysiological confirmation of optogenetic driving.** A) mCherry

943 signal indicating expression of ChR2 in ACA neurons and B) not in areas posterior to ACA which

944 project to V1. C) Axon terminals of long-range projecting neurons from ACA were stimulated in

945 V1 via optogenetics. Channel rhodopsin (ChR2) was expressed virally in ACA via AAV-9s through

946 the synapsin promoter. L.E.D. powered 473 nm light focused (.5mm radius; 12 mW per mm<sup>2</sup>) via

947 a 20x objective on a craniotomy was driven at D) 2-40 Hz (20% duty cycle) or block stimulation.

948 Overall average power per 1 second was held constant for all conditions except the full power

949 block stimulation. E) Local field potentials (LFP) were recorded in ACA to detect antidromic

950 driving. On average (thick line), our stimulation evoked LFP potentials crossing 2.31 standard

951 deviations above baseline ( $p < .01$ ) at approximately 11.5 ms after light onset and returned to

952 baseline at approximately 24.5 ms. Given known onset kinetics of  $\approx 1.5$  ms and offset kinetics of

953  $\approx 13.5$  ms (Lin, J.Y., Exp. Physiol 2012), we estimated a conduction speed of 10 ms from ACA to

954 V1. F) Stimulus induced average power and standard deviations (across trials) display strong

955 activation of ACA at the driving frequencies via illumination of the terminals. Notably, frequencies

956 6-40Hz are within 1 stdev of each other ( $n=2$  mice, 8-15 trials each frequency per mice). G-H)

957 Shows an averaged evoked LFP responses to each frequency for two representative mice. Notably,  
958 the low-power block stimulation was insufficient to drive ACa neurons in both mice.  
959

960

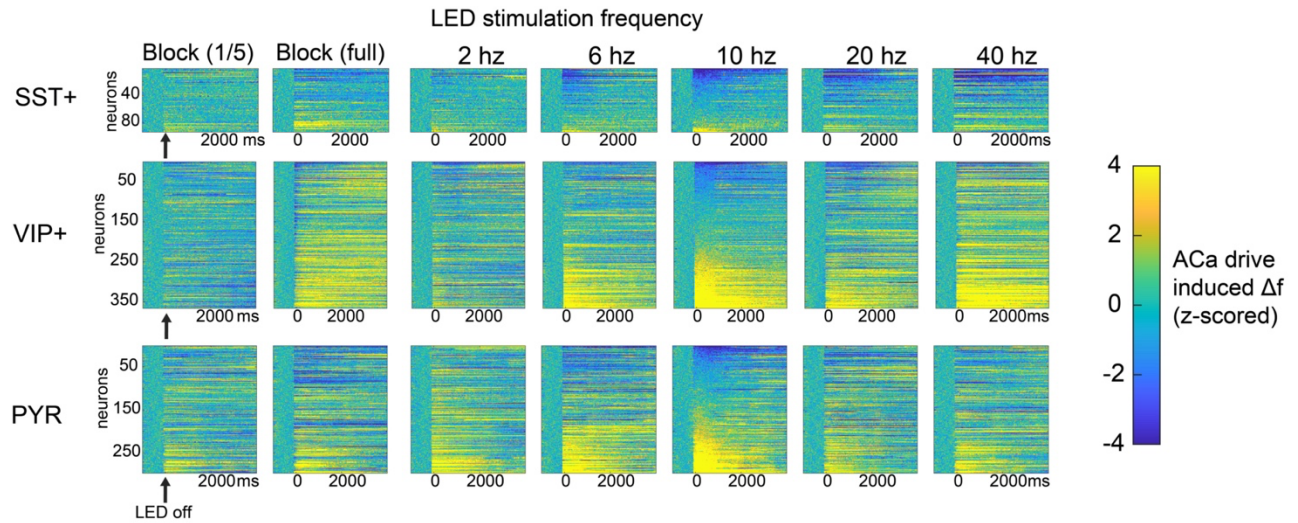

961

962

**Figure S4. Activation of individual SST, VIP, and PYR neurons while driving Aca-**

963

**axons at different frequencies.** Rasterplots of activity immediately before turning on the LED

964

and immediately after turning off the LED (0ms onward). Image signal was saturated during the 1

965

second of stimulation, so this data was excluded, and the 1 second post stimulation was used for

966

analyses (figure 4). Activity of individual neurons was standardized by the standard deviation of

967

the fluorescent signal in the 1-second of data prior to LED in order to allow for visual comparison

968

across cells. Cells are sorted by their response to the 10-Hz condition. Cell identities are the same

969

across all 7 conditions horizontally. Based on the large amount of variability across cells within

970

each class, we carried out a cluster analysis to sort into functionally defined subclasses of neurons.

971

See figure 4.

972

973

974

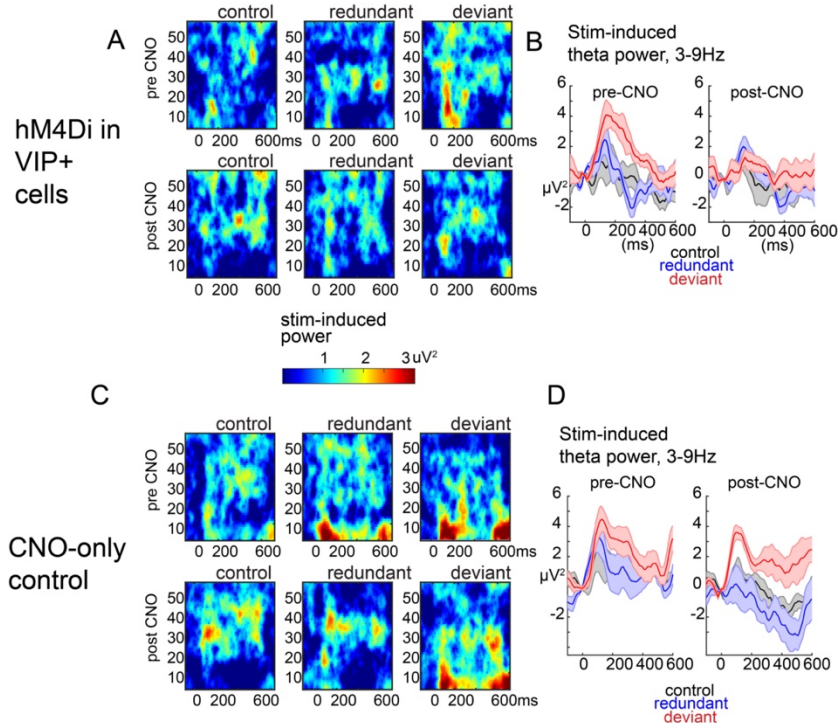

975

976 **Figure S5. Chemicogenetic suppression of VIPs.** A) time-frequency and B) line plots of

977 induced power for pre- (above) and post-CNO treatment in mice with inhibitory DREADDs

978 (hM4D(i)) in VIP interneurons. C,D) same as A,B, but for the CNO-only condition (no-DREADDs

979 in VIPs).

980

981

982

983



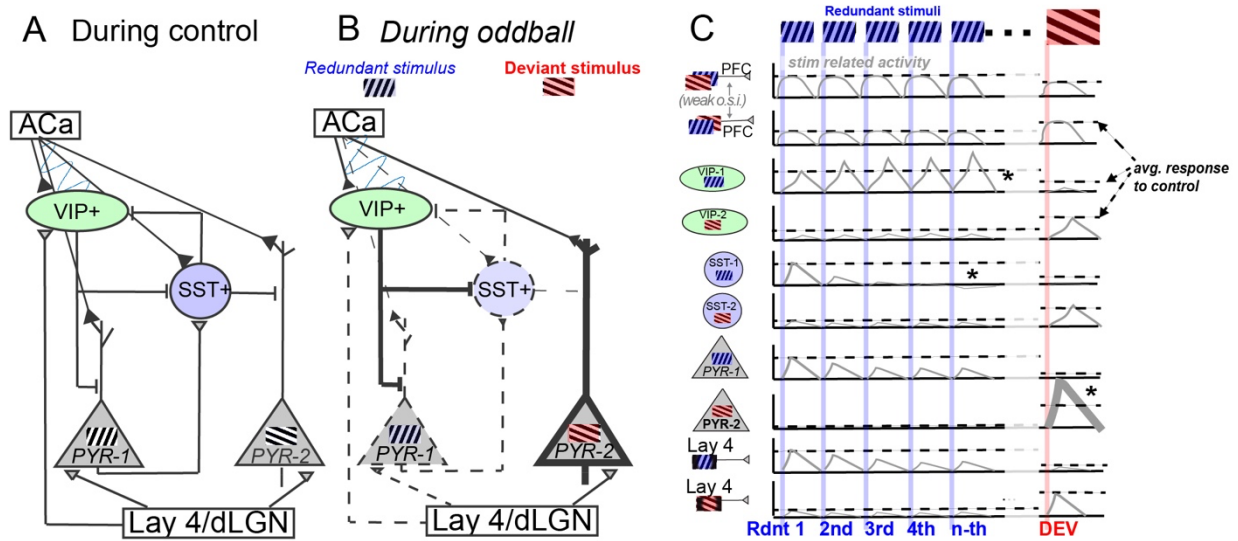

984 **Figure S6. Proposed model of deviance detection in V1.** A schematic based on current  
 985 and past observations (with some testable assumptions about connectivity) to facilitate future work  
 986 into deviance detection circuits. (A) simplified V1 layer 2/3 circuitry. During control run, with  
 987 stimuli of many orientations equally likely, responses to any given stimulus by the circuit is at a  
 988 baseline, with Aca and V1 synchronous in the theta/alpha band. B) During the oddball paradigm,  
 989 inputs from Aca to V1 become more influential (as evidenced by greater theta/alpha granger  
 990 causality) and more varied, potentially dependent on postsynaptic target (VIPs vs SSTs vs PYRs  
 991 selective for redundant or deviant). Line-thicknesses depict how a cell population's excitability is  
 992 modulated during the oddball, relative to the many-standards control (thicker = greater response  
 993 to its preferred stimulus over baseline). Top-down modulation at theta/alpha frequencies  
 994 potentiates VIPs and suppresses SSTs, which, in turn, disinhibits PYRs which are not already  
 995 adapted (i.e. PYRs selective for stimuli other than the redundant). (C) Activity dynamics during  
 996 the oddball paradigm for each cell type, relative to its selectivity (based on figure S2). Horizontal  
 997 dotted lines depict response of cell population to each stimulus orientation in the control context.



- 998 From top: \*absent SSA in ACA, \*enhanced SSA in SST-1s to the redundant stimulus, and \*DD  
999 in SST-2 and PYR-2. Layer 4 cell activity based on Hamm et al 2021<sup>42</sup>  
1000  
1001  
1002
- 1003 1. Friston, K. (2003). Learning and inference in the brain. *Neural Netw. Off. J. Int. Neural Netw.*  
1004 *Soc.* *16*, 1325–1352. [10.1016/j.neunet.2003.06.005](https://doi.org/10.1016/j.neunet.2003.06.005).
  - 1005 2. Friston, K. (2005). A theory of cortical responses. *Philos. Trans. R. Soc. B Biol. Sci.* *360*, 815–  
1006 836. [10.1098/rstb.2005.1622](https://doi.org/10.1098/rstb.2005.1622).
  - 1007 3. Friston, K., Kilner, J., and Harrison, L. (2006). A free energy principle for the brain. *J. Physiol.*  
1008 *Paris* *100*, 70–87. [10.1016/j.jphysparis.2006.10.001](https://doi.org/10.1016/j.jphysparis.2006.10.001).
  - 1009 4. Friston, K. (2018). Does predictive coding have a future? *Nat. Neurosci.* *21*, 1019–1021.  
1010 [10.1038/s41593-018-0200-7](https://doi.org/10.1038/s41593-018-0200-7).
  - 1011 5. Mumford, D. (1992). On the computational architecture of the neocortex. II. The role of  
1012 cortico-cortical loops. *Biol. Cybern.* *66*, 241–251. [10.1007/BF00198477](https://doi.org/10.1007/BF00198477).
  - 1013 6. Rao, R.P., and Ballard, D.H. (1999). Predictive coding in the visual cortex: a functional  
1014 interpretation of some extra-classical receptive-field effects. *Nat. Neurosci.* *2*, 79–87.  
1015 [10.1038/4580](https://doi.org/10.1038/4580).
  - 1016 7. Bastos, A.M., Usrey, W.M., Adams, R.A., Mangun, G.R., Fries, P., and Friston, K.J. (2012).  
1017 Canonical Microcircuits for Predictive Coding. *Neuron*. [10.1016/j.neuron.2012.10.038](https://doi.org/10.1016/j.neuron.2012.10.038).
  - 1018 8. Chen, I.-W., Helmchen, F., and Lütcke, H. (2015). Specific Early and Late Oddball-Evoked  
1019 Responses in Excitatory and Inhibitory Neurons of Mouse Auditory Cortex. *J. Neurosci.* *35*,  
1020 12560–12573. [10.1523/JNEUROSCI.2240-15.2015](https://doi.org/10.1523/JNEUROSCI.2240-15.2015).
  - 1021 9. Parras, G.G., Nieto-Diego, J., Carbajal, G.V., Valdés-Baizabal, C., Escera, C., and Malmierca,  
1022 M.S. (2017). Neurons along the auditory pathway exhibit a hierarchical organization of  
1023 prediction error. *Nat. Commun.* *8*, 2148. [10.1038/s41467-017-02038-6](https://doi.org/10.1038/s41467-017-02038-6).
  - 1024 10. Bastos, A.M., Lundqvist, M., Waite, A.S., Kopell, N., and Miller, E.K. (2020). Layer and  
1025 rhythm specificity for predictive routing. *Proc. Natl. Acad. Sci. U. S. A.* *117*, 31459–31469.  
1026 [10.1073/pnas.2014868117](https://doi.org/10.1073/pnas.2014868117).

- 1027 11. Hamm, J.P., and Yuste, R. (2016). Somatostatin Interneurons Control a Key Component of  
1028 Mismatch Negativity in Mouse Visual Cortex. *Cell Rep.* *16*, 597–604.  
1029 10.1016/j.celrep.2016.06.037.
- 1030 12. Jordan, R., and Keller, G. (2020). Opposing Influence of Top-down and Bottom-up Input on  
1031 Excitatory Layer 2/3 Neurons in Mouse Primary Visual Cortex. *Neuron*.  
1032 10.1016/J.NEURON.2020.09.024.
- 1033 13. Keller, A.J., Dipoppa, M., Roth, M.M., Caudill, M.S., Ingrosso, A., Miller, K.D., and Scanziani,  
1034 M. (2020). A Disinhibitory Circuit for Contextual Modulation in Primary Visual Cortex.  
1035 *Neuron* *108*, 1181-1193.e8. 10.1016/j.neuron.2020.11.013.
- 1036 14. Hamm, J.P., Shymkiv, Y., Han, S., Yang, W., and Yuste, R. (2021). Cortical ensembles  
1037 selective for context. *Proc. Natl. Acad. Sci. U. S. A.* *118*. 10.1073/pnas.2026179118.
- 1038 15. Kremláček, J., Kreegipuu, K., Tales, A., Astikainen, P., Pöldver, N., Näätänen, R., and  
1039 Stefanics, G. (2016). Visual mismatch negativity (vMMN): A review and meta-analysis of  
1040 studies in psychiatric and neurological disorders. *Cortex* *80*, 76–112.  
1041 10.1016/j.cortex.2016.03.017.
- 1042 16. Tremblay, R., Lee, S., and Rudy, B. (2016). GABAergic Interneurons in the Neocortex: From  
1043 Cellular Properties to Circuits. *Neuron* *91*, 260–292. 10.1016/j.neuron.2016.06.033.
- 1044 17. Buzsáki, G., and Chrobak, J.J. (1995). Temporal structure in spatially organized neuronal  
1045 ensembles: a role for interneuronal networks. *Curr. Opin. Neurobiol.* *5*, 504–510.  
1046 10.1016/0959-4388(95)80012-3.
- 1047 18. Pfeffer, C.K., Xue, M., He, M., Huang, Z.J., and Scanziani, M. (2013). Inhibition of inhibition in  
1048 visual cortex: the logic of connections between molecularly distinct interneurons. *Nat.*  
1049 *Neurosci.* *16*, 1068–1076. 10.1038/nn.3446.
- 1050 19. Karnani, M.M., Jackson, J., Ayzenshtat, I., Tucciarone, J., Manoocheri, K., Snider, W.G.,  
1051 Yuste, R., Bathellier, B., Ushakova, L., Rumpel, S., et al. (2016). Cooperative Subnetworks of  
1052 Molecularly Similar Interneurons in Mouse Neocortex. *Neuron* *90*, 86–100.  
1053 10.1016/j.neuron.2016.02.037.
- 1054 20. G, M., Y, L., L, W., Z, X., K, S., Y, W., W, P., X, L., Z, W., S, J., et al. (2021). Hierarchy in sensory  
1055 processing reflected by innervation balance on cortical interneurons. *Sci. Adv.* *7*.  
1056 10.1126/SCIADV.ABF5676.
- 1057 21. Lee, S.-H., Kwan, A.C., Zhang, S., Phoumthippavong, V., Flannery, J.G., Masmanidis, S.C.,  
1058 Taniguchi, H., Huang, Z.J., Zhang, F., Boyden, E.S., et al. (2012). Activation of specific  
1059 interneurons improves V1 feature selectivity and visual perception. *Nature* *488*, 379–383.  
1060 10.1038/nature11312.

- 1061 22. Markram, H., Toledo-Rodriguez, M., Wang, Y., Gupta, A., Silberberg, G., and Wu, C. (2004).  
1062 Interneurons of the neocortical inhibitory system. *Nat. Rev. Neurosci.* 5, 793–807.  
1063 10.1038/nrn1519.
- 1064 23. Ross, J.M., and Hamm, J.P. (2020). Cortical Microcircuit Mechanisms of Mismatch Negativity  
1065 and Its Underlying Subcomponents. *Front. Neural Circuits* 14, 1–15.  
1066 10.3389/fncir.2020.00013.
- 1067 24. Zhang, S., Xu, M., Kamigaki, T., Hoang Do, J.P., Chang, W.-C., Jenvay, S., Miyamichi, K., Luo,  
1068 L., and Dan, Y. (2014). Selective attention. Long-range and local circuits for top-down  
1069 modulation of visual cortex processing. *Science* 345, 660–665. 10.1126/science.1254126.
- 1070 25. Norman, K.J., Riceberg, J.S., Koike, H., Bateh, J., McCraney, S.E., Caro, K., Kato, D., Liang, A.,  
1071 Yamamuro, K., Flanigan, M.E., et al. (2021). Post-error recruitment of frontal sensory  
1072 cortical projections promotes attention in mice. *Neuron* 109, 1202-1213.e5.  
1073 10.1016/j.neuron.2021.02.001.
- 1074 26. Pi, H.-J., Hangya, B., Kvitsiani, D., Sanders, J.I., Huang, Z.J., and Kepecs, A. (2013). Cortical  
1075 interneurons that specialize in disinhibitory control. *Nature* 503, 521–524.  
1076 10.1038/nature12676.
- 1077 27. Kamigaki, T. (2019). Dissecting executive control circuits with neuron types. *Neurosci. Res.*  
1078 141, 13–22. 10.1016/j.neures.2018.07.004.
- 1079 28. Buzsáki, G., and Wang, X.-J. (2012). Mechanisms of Gamma Oscillations. *Annu. Rev.*  
1080 *Neurosci.* 35, 203–225. 10.1146/annurev-neuro-062111-150444.
- 1081 29. J, H., M, W., JM, P., W, S., P, U., and S, P. (2017). Whole-Brain Source-Reconstructed MEG-  
1082 Data Reveal Reduced Long-Range Synchronization in Chronic Schizophrenia. *eNeuro* 4.  
1083 10.1523/ENEURO.0338-17.2017.
- 1084 30. Uhlhaas, P.J., and Singer, W. (2010). Abnormal neural oscillations and synchrony in  
1085 schizophrenia. *Nat. Rev. Neurosci.* 10.1038/nrn2774.
- 1086 31. Hong, L.E., Buchanan, R.W., Thaker, G.K., Shepard, P.D., and Summerfelt, A. (2008). Beta  
1087 (~16 Hz) frequency neural oscillations mediate auditory sensory gating in humans.  
1088 *Psychophysiology* 45, 197–204. 10.1111/j.1469-8986.2007.00624.x.
- 1089 32. HajiHosseini, A., Rodríguez-Fornells, A., and Marco-Pallarés, J. (2012). The role of beta-  
1090 gamma oscillations in unexpected rewards processing. *NeuroImage* 60, 1678–1685.  
1091 10.1016/J.NEUROIMAGE.2012.01.125.
- 1092 33. Hamm, J.P., Dyckman, K.A., McDowell, J.E., and Clementz, B.A. (2012). Pre-cue fronto-  
1093 occipital alpha phase and distributed cortical oscillations predict failures of cognitive  
1094 control. *J. Neurosci.* 32, 7034–7041. 10.1523/JNEUROSCI.5198-11.2012.

- 1095 34. Herweg, N.A., Solomon, E.A., and Kahana, M.J. (2020). Theta oscillations in human memory.  
1096 Trends Cogn. Sci. 24, 208. 10.1016/J.TICS.2019.12.006.
- 1097 35. Schmieidt, C., Brand, A., Hildebrandt, H., and Basar-Eroglu, C. (2005). Event-related theta  
1098 oscillations during working memory tasks in patients with schizophrenia and healthy  
1099 controls. Cogn. Brain Res. 25, 936–947. 10.1016/J.COGBRAINRES.2005.09.015.
- 1100 36. Abbas, A.I., Sundiang, M.J.M., Henoch, B., Morton, M.P., Bolkan, S.S., Park, A.J., Harris, A.Z.,  
1101 Kellendonk, C., and Gordon, J.A. (2018). Somatostatin Interneurons Facilitate Hippocampal-  
1102 Prefrontal Synchrony and Prefrontal Spatial Encoding. Neuron 100, 926-939.e3.  
1103 10.1016/j.neuron.2018.09.029.
- 1104 37. Buzsaki, G. (2009). Rhythms of the Brain (Oxford University Press).
- 1105 38. Bastos, A.M., Vezoli, J., Bosman, C.A., Schoffelen, J.M., Oostenveld, R., Dowdall, J.R.,  
1106 DeWeerd, P., Kennedy, H., and Fries, P. (2015). Visual areas exert feedforward and feedback  
1107 influences through distinct frequency channels. Neuron 85, 390–401.  
1108 10.1016/j.neuron.2014.12.018.
- 1109 39. Lee, M., Sehatpour, P., Hoptman, M.J., Lakatos, P., Dias, E.C., Kantrowitz, J.T., Martinez,  
1110 A.M., and Javitt, D.C. (2017). Neural mechanisms of mismatch negativity dysfunction in  
1111 schizophrenia. Mol. Psychiatry 22, 1585–1593. 10.1038/mp.2017.3.
- 1112 40. Bastos, A.M., Lundqvist, M., Waite, A.S., Kopell, N., and Miller, E.K. (2020). Layer and  
1113 rhythm specificity for predictive routing. Proc. Natl. Acad. Sci. U. S. A. 117, 31459–31469.  
1114 10.1073/pnas.2014868117.
- 1115 41. Zhang, S., Xu, M., Chang, W.-C., Ma, C., Hoang Do, J.P., Jeong, D., Lei, T., Fan, J.L., and Dan,  
1116 Y. (2016). Organization of long-range inputs and outputs of frontal cortex for top-down  
1117 control. Nat. Neurosci. 10.1038/nn.4417.
- 1118 42. Hamm, J.P., Shymkiv, Y., Han, S., Yang, W., and Yuste, R. (2021). Cortical ensembles  
1119 selective for context. Proc. Natl. Acad. Sci. 118, 1–12. 10.1073/pnas.2026179118.
- 1120 43. Niell, C.M., and Stryker, M.P. (2010). Modulation of visual responses by behavioral state in  
1121 mouse visual cortex. Neuron 65, 472–479. 10.1016/j.neuron.2010.01.033.
- 1122 44. Szadai, Z., Pi, H.-J., Chevy, Q., Ócsai, K., Albeanu, D.F., Chiovini, B., Szalay, G., Katona, G.,  
1123 Kepecs, A., and Rózsa, B. (2022). Cortex-wide response mode of VIP-expressing inhibitory  
1124 neurons by reward and punishment. eLife 11, e78815. 10.7554/eLife.78815.
- 1125 45. Hamm, J.P., Shymkiv, Y., Han, S., Yang, W., and Yuste, R. (2021). Cortical ensembles  
1126 selective for context. Proc. Natl. Acad. Sci. USA.

- 1127 46. Uhlhaas, P.J., Pipa, G., Neuenschwander, S., Wibral, M., and Singer, W. (2011). A new look  
1128 at gamma? High- (>60 Hz)  $\gamma$ -band activity in cortical networks: function, mechanisms and  
1129 impairment. *Prog. Biophys. Mol. Biol.* *105*, 14–28. [10.1016/j.pbiomolbio.2010.10.004](https://doi.org/10.1016/j.pbiomolbio.2010.10.004).
- 1130 47. Logothetis, N.K., Pauls, J., Augath, M., Trinath, T., and Oeltermann, a (2001).  
1131 Neurophysiological investigation of the basis of the fMRI signal. *Nature* *412*, 150–157.  
1132 [10.1038/35084005](https://doi.org/10.1038/35084005).
- 1133 48. Apicella, A.J., and Marchionni, I. (2022). VIP-Expressing GABAergic Neurons: Disinhibitory  
1134 vs. Inhibitory Motif and Its Role in Communication Across Neocortical Areas. *Front. Cell.*  
1135 *Neurosci.* *16*, 811484. [10.3389/fncel.2022.811484](https://doi.org/10.3389/fncel.2022.811484).
- 1136 49. Bastos, A.M., Usrey, W.M., Adams, R.A., Mangun, G.R., Fries, P., and Friston, K.J. (2012).  
1137 Canonical Microcircuits for Predictive Coding. *Neuron*. [10.1016/j.neuron.2012.10.038](https://doi.org/10.1016/j.neuron.2012.10.038).
- 1138 50. Sammari, M., Inglebert, Y., Ankri, N., Russier, M., Incontro, S., and Debanne, D. (2022).  
1139 Theta patterns of stimulation induce synaptic and intrinsic potentiation in O-LM  
1140 interneurons. *Proc. Natl. Acad. Sci.* *119*, e2205264119. [10.1073/pnas.2205264119](https://doi.org/10.1073/pnas.2205264119).
- 1141 51. Bastos, A.M., Vezoli, J., Bosman, C.A., Schoffelen, J.M., Oostenveld, R., Dowdall, J.R.,  
1142 DeWeerd, P., Kennedy, H., and Fries, P. (2015). Visual areas exert feedforward and feedback  
1143 influences through distinct frequency channels. *Neuron* *85*, 390–401.  
1144 [10.1016/j.neuron.2014.12.018](https://doi.org/10.1016/j.neuron.2014.12.018).
- 1145 52. Millman, D.J., Ocker, G.K., Caldejon, S., Kato, I., Larkin, J.D., Lee, E.K., Luviano, J., Nayan, C.,  
1146 Nguyen, T.V., North, K., et al. (2020). VIP interneurons in mouse primary visual cortex  
1147 selectively enhance responses to weak but specific stimuli. *eLife* *9*, e55130.  
1148 [10.7554/eLife.55130](https://doi.org/10.7554/eLife.55130).
- 1149 53. Jackson, J., Ayzenshtat, I., Karnani, M.M., and Yuste, R. (2016). VIP+ interneurons control  
1150 neocortical activity across brain states. *J. Neurophysiol.*, [jn.01124.2015](https://doi.org/jn.01124.2015).  
1151 [10.1152/jn.01124.2015](https://doi.org/10.1152/jn.01124.2015).
- 1152 54. Karnani, M.M., Jackson, J., Ayzenshtat, I., Hamzehei Sichani, A., Manoocheri, K., Kim, S., and  
1153 Yuste, R. (2016). Opening Holes in the Blanket of Inhibition: Localized Lateral Disinhibition  
1154 by VIP Interneurons. *J. Neurosci.* *36*, 3471–3480. [10.1523/JNEUROSCI.3646-15.2016](https://doi.org/10.1523/JNEUROSCI.3646-15.2016).
- 1155 55. Jiang, X., Shen, S., Cadwell, C.R., Berens, P., Sinz, F., Ecker, A.S., Patel, S., and Tolias, A.S.  
1156 (2015). Principles of connectivity among morphologically defined cell types in adult  
1157 neocortex. *Science* *350*, aac9462-1–9. [10.1126/science.aac9462](https://doi.org/10.1126/science.aac9462).
- 1158 56. Karnani, M.M., Agetsuma, M., and Yuste, R. (2014). A blanket of inhibition: functional  
1159 inferences from dense inhibitory connectivity. *Curr. Opin. Neurobiol.* *26*, 96–102.  
1160 [10.1016/j.conb.2013.12.015](https://doi.org/10.1016/j.conb.2013.12.015).

- 1161 57. Garrett, M., Manavi, S., Roll, K., Ollerenshaw, D.R., Groblewski, P.A., Ponvert, N.D., Kiggins,  
1162 J.T., Casal, L., Mace, K., Williford, A., et al. (2020). Experience shapes activity dynamics and  
1163 stimulus coding of VIP inhibitory cells. *eLife* 9, e50340. 10.7554/eLife.50340.
- 1164 58. Light, G.A., and Näätänen, R. (2013). Mismatch negativity is a breakthrough biomarker for  
1165 understanding and treating psychotic disorders. *Proc. Natl. Acad. Sci. U. S. A.* 110, 15175–  
1166 15176. 10.1073/pnas.1313287110.
- 1167 59. Javitt, D.C., Lee, M., Kantrowitz, J.T., and Martinez, A. (2018). Mismatch negativity as a  
1168 biomarker of theta band oscillatory dysfunction in schizophrenia. *Schizophr. Res.* 191, 51–  
1169 60. 10.1016/j.schres.2017.06.023.
- 1170 60. Gaebler, A.J., Mathiak, K., Koten, J.W., König, A.A., Koush, Y., Weyer, D., Depner, C.,  
1171 Matentzoglou, S., Edgar, J.C., Willmes, K., et al. (2015). Auditory mismatch impairments are  
1172 characterized by core neural dysfunctions in schizophrenia. *Brain* 138, 1410–1423.  
1173 10.1093/brain/awv049.
- 1174 61. Kim, D.I., Mathalon, D.H., Ford, J.M., Mannell, M., Turner, J.A., Brown, G.G., Belger, A.,  
1175 Gollub, R., Lauriello, J., Wible, C., et al. (2009). Auditory Oddball Deficits in Schizophrenia:  
1176 An Independent Component Analysis of the fMRI Multisite Function BIRN Study. *Schizophr.*  
1177 *Bull.* 35, 67–81. 10.1093/schbul/sbn133.
- 1178 62. Sterzer, P., Adams, R.A., Fletcher, P., Frith, C., Lawrie, S.M., Muckli, L., Petrovic, P., Uhlhaas,  
1179 P., Voss, M., and Corlett, P.R. (2018). The Predictive Coding Account of Psychosis. *Biol.*  
1180 *Psychiatry*. 10.1016/j.biopsych.2018.05.015.
- 1181 63. Kaser, M., Soltesz, F., Lawrence, P., Miller, S., Dodds, C., Croft, R., Dudas, R.B., Zaman, R.,  
1182 Fernandez-Egea, E., Müller, U., et al. (2013). Oscillatory underpinnings of mismatch  
1183 negativity and their relationship with cognitive function in patients with schizophrenia. *PLoS*  
1184 *One* 8, e83255. 10.1371/journal.pone.0083255.
- 1185 64. Glantz, L.A., and Lewis, D.A. (2000). Decreased dendritic spine density on prefrontal cortical  
1186 pyramidal neurons in schizophrenia. *Arch. Gen. Psychiatry* 57, 65–73.
- 1187 65. Kolluri, N., Sun, Z., Sampson, A.R., and Lewis, D.A. (2005). Lamina-Specific Reductions in  
1188 Dendritic Spine Density in the Prefrontal Cortex of Subjects With Schizophrenia. *Am. J.*  
1189 *Psychiatry* 162, 1200–1202. 10.1176/appi.ajp.162.6.1200.
- 1190 66. Reilly, J.L., Harris, M.S.H., Khine, T.T., Keshavan, M.S., and Sweeney, J. a (2008). Reduced  
1191 attentional engagement contributes to deficits in prefrontal inhibitory control in  
1192 schizophrenia. *Biol. Psychiatry* 63, 776–783. 10.1016/j.biopsych.2007.11.009.
- 1193 67. Rolls, E.T., Loh, M., Deco, G., and Winterer, G. (2008). Computational models of  
1194 schizophrenia and dopamine modulation in the prefrontal cortex. *Nat. Rev. Neurosci.* 9,  
1195 696–709. 10.1038/nrn2462.



- 1196 68. Weinberger, D.R., Aloia, M.S., Goldberg, T.E., and Berman, K.F. (1994). The frontal lobes and  
1197 schizophrenia [published erratum appears in *J Neuropsychiatry Clin Neurosci* 1995  
1198 Winter;7(1):121]. *J. Neuropsychiatry Clin. Neurosci.* 6, 419–427. 10.1176/jnp.6.4.419.
- 1199 69. Kahn, R.S., and Keefe, R.S.E. (2013). Schizophrenia is a cognitive illness: time for a change in  
1200 focus. *JAMA Psychiatry* 70, 1107–1112. 10.1001/jamapsychiatry.2013.155.
- 1201 70. Hashimoto, T., Bazmi, H.H., Mirnics, K., Wu, Q., Sampson, A.R., and Lewis, D.A. (2008).  
1202 Conserved regional patterns of GABA-related transcript expression in the neocortex of  
1203 subjects with schizophrenia. *Am. J. Psychiatry* 165, 479–489.  
1204 10.1176/appi.ajp.2007.07081223.
- 1205 71. Hamm, J.P., Bobilev, A.M., Hayrynen, L.K., Hudgens-Haney, M.E., Oliver, W.T., Parker, D.A.,  
1206 McDowell, J.E., Buckley, P.A., and Clementz, B.A. (2015). Stimulus train duration but not  
1207 attention moderates gamma-band entrainment abnormalities in schizophrenia. *Schizophr.*  
1208 *Res.* 165, 97–102. 10.1016/j.schres.2015.02.016.
- 1209 72. Chen, Y. (2011). Abnormal visual motion processing in schizophrenia: a review of research  
1210 progress. *Schizophr. Bull.* 37, 709–715. 10.1093/schbul/sbr020.
- 1211 73. Rabinowicz, E.F., Silipo, G., Goldman, R., and Javitt, D.C. (2000). Auditory sensory  
1212 dysfunction in schizophrenia: imprecision or distractibility? *Arch. Gen. Psychiatry* 57, 1149–  
1213 1155.
- 1214 74. Javitt, D.C. (2009). When doors of perception close: bottom-up models of disrupted  
1215 cognition in schizophrenia. *Annu. Rev. Clin. Psychol.* 5, 249–275.  
1216 10.1146/annurev.clinpsy.032408.153502.
- 1217 75. Hamm, J.P., Shymkiv, Y., Han, S., Yang, W., and Yuste, R. (2021). Cortical ensembles  
1218 selective for context. *Proc. Natl. Acad. Sci. U. S. A.* 118. 10.1073/pnas.2026179118.
- 1219 76. Hamm, J.P., Peterka, D.S., Gogos, J.A., and Yuste, R. (2017). Altered Cortical Ensembles in  
1220 Mouse Models of Schizophrenia. *Neuron* 94, 153–167. 10.1016/j.neuron.2017.03.019.
- 1221 77. Dubbs, A., Guevara, J., and Yuste, R. (2016). moco: Fast Motion Correction for Calcium  
1222 Imaging. *Front. Neuroinformatics* 10, 6. 10.3389/fninf.2016.00006.
- 1223 78. Miller, J. -e. K., Ayzenshtat, I., Carrillo-Reid, L., and Yuste, R. (2014). Visual stimuli recruit  
1224 intrinsically generated cortical ensembles. *Proc. Natl. Acad. Sci.* 111, E4053-4061.  
1225 10.1073/pnas.1406077111.
- 1226 79. Chen, T.W., Wardill, T.J., Sun, Y., Pulver, S.R., Renninger, S.L., Baohan, A., Schreiter, E.R.,  
1227 Kerr, R.A., Orger, M.B., Jayaraman, V., et al. (2013). Ultrasensitive fluorescent proteins for  
1228 imaging neuronal activity. *Nature* 499, 295–300. 10.1038/nature12354.



- 1229 80. Land, R., Engler, G., Kral, A., and Engel, A.K. (2013). Response properties of local field  
1230 potentials and multiunit activity in the mouse visual cortex. *Neuroscience* 254, 141–151.  
1231 [10.1016/j.neuroscience.2013.08.065](https://doi.org/10.1016/j.neuroscience.2013.08.065).
- 1232 81. Lee, M., Balla, A., Sershen, H., Sehatpour, P., Lakatos, P., and Javitt, D. (2018). Rodent  
1233 Mismatch Negativity/theta Neuro-Oscillatory Response as a Translational  
1234 Neurophysiological Biomarker for N-Methyl-D-Aspartate Receptor-Based New Treatment  
1235 Development in Schizophrenia. *Neuropsychopharmacol. Off. Publ. Am. Coll.*  
1236 *Neuropsychopharmacol.* 43, 571–582. [10.1038/NPP.2017.176](https://doi.org/10.1038/NPP.2017.176).
- 1237 82. Hamm, J.P., Ethridge, L.E., Shapiro, J.R., Stevens, M.C., Boutros, N.N., Summerfelt, A.T.,  
1238 Keshavan, M.S., Sweeney, J.A., Pearlson, G., Tamminga, C.A., et al. (2012). Spatiotemporal  
1239 and frequency domain analysis of auditory paired stimuli processing in schizophrenia and  
1240 bipolar disorder with psychosis. *Psychophysiology* 49, 522–530. [10.1111/j.1469-  
1241 8986.2011.01327.x](https://doi.org/10.1111/j.1469-8986.2011.01327.x).
- 1242 83. Moratti, S., Clementz, B. a, Gao, Y., Ortiz, T., and Keil, A. (2007). Neural mechanisms of  
1243 evoked oscillations: stability and interaction with transient events. *Hum. Brain Mapp.* 28,  
1244 1318–1333. [10.1002/hbm.20342](https://doi.org/10.1002/hbm.20342).
- 1245 84. Hamm, J.P., Dyckman, K.A., McDowell, J.E., and Clementz, B.A. (2012). Pre-cue fronto-  
1246 occipital alpha phase and distributed cortical oscillations predict failures of cognitive  
1247 control. *J. Neurosci.* 32, 7034–7041. [10.1523/JNEUROSCI.5198-11.2012](https://doi.org/10.1523/JNEUROSCI.5198-11.2012).
- 1248 85. Bastos, A.M., Vezoli, J., Bosman, C.A., Schoffelen, J.M., Oostenveld, R., Dowdall, J.R.,  
1249 DeWeerd, P., Kennedy, H., and Fries, P. (2015). Visual areas exert feedforward and feedback  
1250 influences through distinct frequency channels. *Neuron* 85, 390–401.  
1251 [10.1016/j.neuron.2014.12.018](https://doi.org/10.1016/j.neuron.2014.12.018).
- 1252 86. Mazurek, M., Kager, M., and Van Hooser, S.D. (2014). Robust quantification of orientation  
1253 selectivity and direction selectivity. *Front. Neural Circuits* 8, 1–17.  
1254 [10.3389/fncir.2014.00092](https://doi.org/10.3389/fncir.2014.00092).
- 1255 87. Hamm, J.P., Shymkiv, Y., Mukai, J., Gogos, J.A., and Yuste, R. (2020). Aberrant Cortical  
1256 Ensembles and Schizophrenia-like Sensory Phenotypes in *Setd1a*<sup>+/-</sup> Mice. *Biol. Psychiatry*  
1257 88, 215–233. [10.1016/j.biopsych.2020.01.004](https://doi.org/10.1016/j.biopsych.2020.01.004).
- 1258 88. Stringer, C., Pachitariu, M., Steinmetz, N., Reddy, C.B., Carandini, M., and Harris, K.D.  
1259 (2019). Spontaneous behaviors drive multidimensional, brainwide activity. *Science* 364.  
1260 [10.1126/science.aav7893](https://doi.org/10.1126/science.aav7893).

1261

1262
